# Supplementary material
Source: publisher site journal article supplement (https://www.dovepress.com/article/123680)

## Supplementary materials

| Study, year     | Group                     | median follow-up (month) | Intervention                                                                                                                                                                                                                                                                       |
|-----------------|---------------------------|--------------------------|------------------------------------------------------------------------------------------------------------------------------------------------------------------------------------------------------------------------------------------------------------------------------------|
|                 |                           |                          | Drugs (day administered)×no. of cycles (duration, days)                                                                                                                                                                                                                            |
| Mateos 2014     | VMP                       | 72                       | V:1.3mg/m <sup>2</sup> (1,4,8,11,22,25,29,32)×1(42) then 1.3mg/m <sup>2</sup> (1,8,15,22)×5(35), M:9mg/m <sup>2</sup> (1-4)×1(42)then 9mg/m <sup>2</sup> (1-4)×5(35), P:60mg/m <sup>2</sup> (1-4)×1(42) then 60mg/m <sup>2</sup> (1-4)×5(35)                                       |
|                 | VTD                       |                          | V:1.3mg/m <sup>2</sup> (1,4,8,11,22,25,29,32)×1(42)then 1.3mg/m <sup>2</sup> (1,8,15,22)×5(35), P:60mg/m <sup>2</sup> (1-4)×1(42)then 60mg/m <sup>2</sup> (1-4)×5(35), T:50mg(1-15)×1(42)then 100mg(1-35)×5(35)                                                                    |
| Palumbo 2014    | VMPT-VT                   | 23.2                     | V: 1.3mg/m <sup>2</sup> (1,4,8,11,22,25,29,32)×4(42) then 1.3mg/m <sup>2</sup> (1,8,22,29)×5(42),M:9mg/m <sup>2</sup> (1-4)×9(42), P:60mg/m <sup>2</sup> (1-4)×9(42), T:50mg per day continuously, maintenance: V: 1.3mg/m <sup>2</sup> every 14 days, T:50mg per day continuously |
|                 | VMP                       |                          | V: 1.3mg/m <sup>2</sup> (1,4,8,11,22,25,29,32)×4(42) then 1.3mg/m <sup>2</sup> (1,8,22,29)×5(42), M:9 mg/m <sup>2</sup> (1-4)×9(42), P:60 mg/m <sup>2</sup> (1-4)×9(42)                                                                                                            |
| Miguel 2013     | VMP                       | 30                       | V: 1.3mg/m <sup>2</sup> (1,4,8,11,22,25,29,32)×4(42) then 1.3mg/m <sup>2</sup> (1,8,22,29)×5(42), M:9mg/m <sup>2</sup> (1-4)×9(42), P:60 mg/m <sup>2</sup> (1-4)×9(42)                                                                                                             |
|                 | MP                        |                          | M:9mg/m <sup>2</sup> (1-4)×9(42), P:60 mg/m <sup>2</sup> (1-4)×9(42)                                                                                                                                                                                                               |
| Miguel 2014     | VMPS                      | 23.3                     | V: 1.3mg/m <sup>2</sup> (1,4,8,11,22,25,29,32)×4(42) then 1.3mg/m <sup>2</sup> (1,8,22,29)×5(42), M:9mg/m <sup>2</sup> (1-4)×9(42), P:60 mg/m <sup>2</sup> (1-4)×9(42), S: 11 mg/kg every 3 weeks                                                                                  |
|                 | VMP                       |                          | V: 1.3mg/m <sup>2</sup> (1,4,8,11,22,25,29,32)×4(42) then 1.3mg/m <sup>2</sup> (1,8,22,29)×5(42), M:9mg/m <sup>2</sup> (1-4)×9(42), P:60 mg/m <sup>2</sup> (1-4)×9(42)                                                                                                             |
| Beksac 2010     | MPT-T                     | 23                       | M:9mg/m <sup>2</sup> (1-4)×8(42), P:60mg/m <sup>2</sup> (1-4)×8(42), T:100mg per day continuously                                                                                                                                                                                  |
|                 | MP                        |                          | M:9mg/m <sup>2</sup> (1-4)×8(42), P:60mg/m <sup>2</sup> (1-4)×8(42)                                                                                                                                                                                                                |
| Waage 2010      | MPT-T                     | 42                       | M:0.25mg/kg(1-4)×X(42)to plateau phase, P:100mg(1-4)×X(42) to plateau phase, T:400 mg daily until plateau phase and thereafter 200 mg daily until progression                                                                                                                      |
|                 | MP                        |                          | M:0.25mg/kg(1-4)×X(42)to plateau phase, P:100mg(1-4)×X(42) to plateau phase, placebo:400 mg daily until plateau phase and thereafter 200 mg daily until progression                                                                                                                |
| Hulin 2009      | MPT                       | 47.5                     | M:0.2mg/kg(1-4)×12(42), P:2mg/kg(1-4)×12(42), T:100mg per day for 72 weeks                                                                                                                                                                                                         |
|                 | MP                        |                          | M:0.2mg/kg(1-4)×12(42), P:2mg/kg(1-4)×12(42), placebo:100mg per day for 72 weeks                                                                                                                                                                                                   |
| Wijermans 2009  | MPT-T                     | 39                       | M:0.25mg/kg(1-5)×8(28), P:1mg/kg(1-5)×8(28), T:200 mg/d until 4 weeks after the last MP-T cycle, then T:50mg per day until disease progression                                                                                                                                     |
|                 | MP                        |                          | M:0.25mg/kg(1-5)×8(28), P:1mg/kg(1-5)×8(28)                                                                                                                                                                                                                                        |
| Morgan 2011     | MP                        | 44                       | M:7mg/m <sup>2</sup> (1-4)×6-9(28), P:40mg(1-4)                                                                                                                                                                                                                                    |
|                 | CTD                       |                          | C:500mg(1,8,15,22)×6-9(28), D:20mg(1-4,15-18)×6-9(28), T:50 mg for 4 weeks and increased every 4 weeks in 50-mg increments to a maximum of 200 mg/day and maintenance                                                                                                              |
| Ludwig 2009     | TD                        | 28.1                     | T:50-400mg per day, D:40mg(1-4,15-18)×5(28) or 40mg(1-4)×4(28)                                                                                                                                                                                                                     |
|                 | MP                        |                          | M:0.25mg/kg(1-4)×9(28/42), P:2mg/kg(1-4)×9(28/42)                                                                                                                                                                                                                                  |
| Benboubker 2014 | Ld                        | 37                       | L:25mg(1-21)×continuous(28), D:40mg(1,8,15,22)×continuous(28)                                                                                                                                                                                                                      |
|                 | continuous Ld 18cycle MPT |                          | L:25mg(1-21)×18(28), D:40mg(1,8,15,22)×18(28)<br>M:0.25mg/kg(1-4)×12(42), P:2mg/kg(1-4)×12(42), T:200mg(1-42)×12(42)                                                                                                                                                               |
| Palumbo 2012    | MPR-R                     | 30                       | M:0.18mg(1-4)×9(28), P:2mg/kg(1-4)×9(28), L:10mg(1-21)×9(28), maintenance:L:10mg(1-21)×X(28)                                                                                                                                                                                       |
|                 | MPR                       |                          | M:0.18mg(1-4)×9(28), P:2mg/kg(1-4)×9(28), placebo                                                                                                                                                                                                                                  |
| Facon 2007      | MP                        | 51.5                     | M:0.25mg/kg(1-4)×12(42), P:2mg/kg(1-4)×12(42)                                                                                                                                                                                                                                      |
|                 | MPT                       |                          | M:0.25mg/kg(1-4)×12(42), P:2mg/kg(1-4)×12(42), T: < 400mg(1-42)×12(42)                                                                                                                                                                                                             |
| palumbo 2006    | MEL100                    | 17.6                     | Vi:9 mg/m <sup>2</sup> (1-4)×2(28), A:9 mg/m <sup>2</sup> (1-4)×2(28), D:40mg(1-4)×2(28),M: 100mg/m <sup>2</sup> MEL100 was repeated once after 2 months                                                                                                                           |
|                 | MPT-T                     |                          | M:4 mg/m <sup>2</sup> (1-7)×6(28), P:40mg/m <sup>2</sup> (1-7)×6(28), T:100mg(1-28)×6(28), maintenance T:100mg per day until relapsed                                                                                                                                              |
| Palumbo 2004    | MP                        | 41                       | M:4 mg/m <sup>2</sup> (1-7)×6(28),P:40mg/m <sup>2</sup> (1-7)×6(28)                                                                                                                                                                                                                |
|                 | MEL100                    |                          | Vi:1mg(1)×2(28), A:50mg/m <sup>2</sup> (1)×2(28), D:40mg(1-4)×2(28), M: 100mg/m <sup>2</sup> MEL100 was repeated once after 2 months                                                                                                                                               |
| Stewart 2015    | MP                        | 40.7                     | M:6mg/m <sup>2</sup> (1-7)×6(28),P:60 mg/m <sup>2</sup> (1-7)×6(28)                                                                                                                                                                                                                |
|                 | MPT-T                     |                          | M:9mg/m <sup>2</sup> (1-4)×12(28), P:100mg(1-4)×12(28), T:100mg per day until disease progression                                                                                                                                                                                  |
| Niesvizky 2015  | MPR-R                     | 42.7                     | M:5mg/m <sup>2</sup> (1-4)×12(28), P:100mg(1-4)×12(28), L:10mg(1-21)×12(28),maintenance:L 10mg per day until disease progression                                                                                                                                                   |
|                 | VD                        |                          | V:1.3mg/m <sup>2</sup> (1,4,8,11)×8(21), D:20mg(1,2,4,5,8,9,11,12)×4(21)or(1,2,4,5)×4(21)                                                                                                                                                                                          |
| Zweegman 2016   | VTD                       | 36                       | V:1.3mg/m <sup>2</sup> (1,4,8,11)×8(21), D:20mg(1,2,4,5,8,9,11,12)×4(21) or (1,2,4,5)×4(21), T:100mg(1-21)×8(21)                                                                                                                                                                   |
|                 | VMP                       |                          | V:1.3mg/m <sup>2</sup> (1,4,8,11)×8(21), M:9mg/m <sup>2</sup> (1-4)×8(21), P:60mg/m <sup>2</sup> (1-4)×8(21),every other cycle, then V:1.6mg/m <sup>2</sup> (1,8,15,22)×5(35)                                                                                                      |
| Magarotto 2016  | MPT-T                     | 39                       | M:0.18mg(1-4)×9(28),P:2mg/kg(1-4)×9(28), T: 200mg/day until 4 weeks after the last cycle of MP, then maintenance: with T 100 mg daily                                                                                                                                              |
|                 | MPR-R                     |                          | M:0.18mg(1-4)×9(28), P:2mg/kg(1-4)×9(28), L:10mg(1-21) every cycles until disease progression                                                                                                                                                                                      |
| Magarotto 2016  | MPR                       | 39                       | M: 0.18 or 0.13mg(1-4)×9(28), P: 1.5mg/kg(1-4)×9(28), L:10mg(1-21)×9(28)                                                                                                                                                                                                           |
|                 | CPR                       |                          | C:50mg every other day×9(21/28), P: 25mg every other day×9(28), L:10mg(1-21)×9(28)                                                                                                                                                                                                 |
|                 | Ld 9 cycles               |                          | L:25mg(1-21)×9(28), D:40 or 20mg(1,8,15,22)×9(28)                                                                                                                                                                                                                                  |

**Supplementary table 1** Details of initial treatments of elderly multiple myeloma patients

**Abbreviations:** V, bortezomib; M, melphalan; P, prednisone; T, thalidomide; D, dexamethasone; S, siltuximab; R/L, lenalidomide; MEL100, reduced-intensity stem cell transplantation using melphalan 100 mg/m<sup>2</sup>; Ld continuous, lenalidomide plus dexamethasone in 28-day cycles until disease progression; Ld 18 cycles, lenalidomide plus dexamethasone for 18 cycles; Ld 9 cycles, lenalidomide plus dexamethasone for 9 cycles.

| Study, year     | randomization | blinding | follow-up | total |
|-----------------|---------------|----------|-----------|-------|
| Mateos 2010     | 2             | 0        | 1         | 3     |
| Palumbo 2010    | 2             | 0        | 1         | 3     |
| Miguel 2008     | 2             | 0        | 1         | 3     |
| Miguel 2014     | 2             | 0        | 0         | 2     |
| Beksac 2010     | 2             | 0        | 1         | 3     |
| Waage 2010      | 2             | 2        | 1         | 5     |
| Hulin 2009      | 2             | 0        | 1         | 3     |
| Wijermans 2009  | 2             | 0        | 1         | 3     |
| Morgan 2011     | 2             | 0        | 1         | 3     |
| Ludwig 2009     | 2             | 1        | 1         | 3     |
| Benboubker 2014 | 2             | 0        | 1         | 3     |
| Palumbo 2012    | 2             | 2        | 1         | 5     |
| Facon 2007      | 2             | 0        | 1         | 3     |
| palumbo 2006    | 2             | 0        | 1         | 3     |
| Palumbo 2004    | 2             | 1        | 1         | 4     |
| Stewart 2015    | 2             | 0        | 1         | 3     |
| Niesvizky 2015  | 2             | 0        | 1         | 3     |
| Zweegman 2016   | 2             | 0        | 1         | 3     |
| Magarotto 2016  | 2             | 0        | 1         | 3     |

**Supplementary table 2** Methodological quality of each article, assessed according to the Jadad scale

| Study, year     | Group         | number | Median age | male(%) | M Protein(%) |         |             |       | ISS stage(%) |         |         | Median $\beta$ -microglobulin,mg/L(range) | Median albumin(range) |
|-----------------|---------------|--------|------------|---------|--------------|---------|-------------|-------|--------------|---------|---------|-------------------------------------------|-----------------------|
|                 |               |        |            |         | IgG          | IgA     | Light chain | Other | I            | II      | III     |                                           |                       |
| Mateos 2010     | VMP           | 130    | 73         | 69(53)  | 81(62)       | 37(28)  | 12(9)       | 0     | 39(30)       | 52(40)  | 39(30)  | NA                                        | NA                    |
|                 | VTD           | 130    | 73         | 61(47)  | 72(55)       | 42(32)  | 16(12)      | 0     | 26(20)       | 56(43)  | 48(37)  | NA                                        | NA                    |
| Palumbo 2010    | VMPT-VT       | 254    | 71         | 130(51) | NA           | NA      | NA          | NA    | 59(23)       | 100(39) | 47(19)  | 3.8(NA)                                   | 37.9(NA)              |
|                 | VMP           | 257    | 71         | 122(47) | NA           | NA      | NA          | NA    | 56(22)       | 88(34)  | 57(22)  | 4(NA)                                     | 37.5(NA)              |
| Miguel 2008     | VMP           | 344    | 71         | 175(51) | 220(64)      | 83(24)  | 28(8)       | 14(4) | 65(19)       | 169(47) | 120(35) | 4.2(1.7-21.6)                             | 3.3(1.3-4.7)          |
|                 | VP            | 338    | 71         | 166(49) | 210(62)      | 88(26)  | 27(8)       | 14(4) | 64(19)       | 159(47) | 115(34) | 4.3(0.6-60.9)                             | 3.3(1.4-5.0)          |
| Miguel 2014     | SVMP          | 52     | 71         | NA      | 22(42)       | 219(41) | 8(15)       | 1(2)  | 4(8)         | 20(38)  | 54(28)  | NA                                        | NA                    |
|                 | VMP           | 54     | 70         | NA      | 37(69)       | 10(19)  | 6(11)       | 1(2)  | 3(5)         | 22(41)  | 54(29)  | NA                                        | NA                    |
| Beksac 2010     | MPT           | 58     | 69         | 35(60)  | 44(83)       | 7(13)   | 1(2)        | 1(2)  | 1(2)         | 34 (59) | 23(40)  | 5.1(0.3-80)                               | 36(20-49)             |
|                 | MP            | 57     | 72         | 27(47)  | 35(71)       | 10(20)  | 1(2)        | 3(6)  | 5(9)         | 26(47)  | 23(44)  | 4.9(0.43-39.9)                            | 36(22-46)             |
| Waage 2010      | MPT           | 182    | 74         | 93(51)  | NA           | NA      | NA          | NA    | 22 (12)      | 75(41)  | 78(43)  | 4.5(NA)                                   | NA                    |
|                 | MP            | 175    | 74         | 107(61) | NA           | NA      | NA          | NA    | 32 (18)      | 51(31)  | 81(46)  | 4.2(NA)                                   | NA                    |
| Hulin 2009      | MPT           | 113    | 78         | 43(38)  | NA           | NA      | NA          | NA    | 25(25)       | 39(40)  | 34(35)  | NA                                        | NA                    |
|                 | MP            | 116    | 78         | 61(43)  | NA           | NA      | NA          | NA    | 26(25)       | 47(45)  | 31(30)  | NA                                        | NA                    |
| Wijermans 2009  | MPT           | 165    | 72         | 94(57)  | 97(59)       | 50(31)  | 17(10)      | 1(1)  | 44(27)       | 42(25)  | 32(19)  | 4(NA)                                     | 34(NA)                |
|                 | MP            | 168    | 73         | 92(55)  | 103(61)      | 49(29)  | 16(10)      | 0     | 39(23)       | 39(23)  | 29(17)  | 4(NA)                                     | 34(NA)                |
| Morgan 2011     | MP            | 423    | 73         | 231(55) | 257(61)      | 101(24) | 49(12)      | 16(4) | 64(15)       | 156(37) | 165(39) | 4.9(0.3-40.4)                             | NA                    |
|                 | CTD           | 426    | 73         | 242(47) | 248(58)      | 100(24) | 54(13)      | 24(6) | 46(11)       | 156(37) | 168(39) | 5(0.4-64)                                 | NA                    |
| Ludwig 2009     | TD            | 145    | 72         | 74(51)  | 91(63)       | 33(23)  | 17(12)      | 4(3)  | 6(4)         | 40(28)  | 99(68)  | 4.2(1-43.5)                               | 36.9(1.8-50.2)        |
|                 | MP            | 143    | 72         | 70(50)  | 94(66)       | 32(22)  | 15(11)      | 2(1)  | 5(4)         | 44(31)  | 94(65)  | 3.9(1.4-41.8)                             | 38(0.95-53.7)         |
| Benboubker 2014 | Ld continuous | 535    | 73         | 294(55) | 334(62)      | 138(26) | 46(9)       | 17(3) | 319(60)      |         | 216(40) | NA                                        | NA                    |
|                 | Ld 18cycle    | 541    | 73         | 273(50) | 331(61)      | 142(26) | 54(10)      | 14(3) | 322(60)      |         | 219(40) | NA                                        | NA                    |
|                 | MPT           | 547    | 73         | 287(52) | 350(64)      | 123(26) | 57(10)      | 17(3) | 323(59)      |         | 224(41) | NA                                        | NA                    |
| Palumbo 2012    | MPR-R         | 152    | 71         | 71(47)  | NA           | NA      | NA          | NA    | 28(18)       | 50(33)  | 74(49)  | NA                                        | NA                    |
|                 | MPR           | 153    | 71         | 82(54)  | NA           | NA      | NA          | NA    | 32(21)       | 47(31)  | 74(49)  | NA                                        | NA                    |
|                 | MP            | 154    | 72         | 75(49)  | NA           | NA      | NA          | NA    | 28(18)       | 48(31)  | 78(51)  | NA                                        | NA                    |
| Facon 2007      | MP            | 196    |            | 109(56) | NA           | NA      | NA          | NA    | 61(34)       | 67(37)  | 54(30)  | NA                                        | NA                    |
|                 | MPT           | 125    |            | 63(50)  | NA           | NA      | NA          | NA    | 38(34)       | 42(38)  | 32(29)  | NA                                        | NA                    |
|                 | MEL100        | 126    |            | 66(52)  | NA           | NA      | NA          | NA    | 33(28)       | 42(36)  | 41(35)  | NA                                        | NA                    |
| palumbo 2006    | MPT           | 129    | 72         | NA      | 83(64)       | 31(24)  | 15(12)      | 0     | 0            | 54(42)  | 75(58)  | 3.7(0.36-40)                              | NA                    |
|                 | MP            | 126    | 72         | NA      | 73(58)       | 37(29)  | 16(13)      | 0     | 0            | 52(41)  | 74(59)  | 3.7(0.2-37.5)                             | NA                    |

|                |             |     |      |           |           |           |         |         |           |           |           |     |     |
|----------------|-------------|-----|------|-----------|-----------|-----------|---------|---------|-----------|-----------|-----------|-----|-----|
| Palumbo 2004   | MEL100      | 44  | 65   | 51 (54)   | 64 (67)   | 22 (23)   | 8 (9)   | 1 (1)   | 0         | 37(39)    | 58(61)    | 2.9 | NA  |
|                | MP          | 36  | 63   | 54 (55)   | 59 (60)   | 27 (27)   | 11 (11) | 2 (2)   | 0         | 37(37)    | 59(63)    | 2.9 | NA  |
| Stewart 2015   | MPT-T       | 154 | 75.8 | 86 (55.8) | 92 (71.3) | 32 (24.8) | NA      | 5 (3.9) | 45 (29.6) | 58 (38.2) | 49 (32.2) | NA  | NA  |
|                | mPR-R       | 152 | 76.6 | 81 (53.3) | 90 (72.6) | 32 (25.8) | NA      | 2 (1.6) | 36 (23.7) | 70 (46.0) | 46 (30.3) | NA  | NA  |
| Niesvizky 2015 | VD          | 168 | 74.5 | 101(60)   | 101 (62)  | 41 (25)   | 21 (13) | 1 (< 1) | 33 (22)   | 70 (46)   | 50 (33)   | 4.5 | 3.5 |
|                | VTD         | 167 | 73   | 70(42)    | 89 (58)   | 43 (28)   | 20 (13) | 2(1)    | 50 (33)   | 53 (35)   | 49 (32)   | 3.9 | 3.7 |
|                | VMP         | 167 | 72   | 90(54)    | 100 (62)  | 40 (25)   | 18 (11) | 3(2)    | 41 (25)   | 63 (39)   | 58 (36)   | 4.1 | 3.5 |
| Zweegman 2016  | MPT-T       | 318 | 72   | 161(51)   | 202(64)   | 87(27)    | 22(7)   | 2(1)    | 75(24)    | 153(48)   | 83(26)    | NA  | NA  |
|                | MPR-R       | 319 | 73   | 185(58)   | 202(63)   | 75(24)    | 38(12)  | 1 (< 1) | 82(26)    | 151(47)   | 82(26)    | NA  | NA  |
| Magarotto 2016 | MPR         | 218 | 74   | 108(50)   | NA        | NA        | NA      | NA      | 61(28)    | 97(45)    | 59(27)    | NA  | NA  |
|                | CPR         | 222 | 73   | 106(48)   | NA        | NA        | NA      | NA      | 59(27)    | 103(46)   | 60(27)    | NA  | NA  |
|                | Ld 9 cycles | 222 | 74   | 108(49)   | NA        | NA        | NA      | NA      | 62(28)    | 99(45)    | 60(27)    | NA  | NA  |

**Supplementary table 3 Patient demographics and baseline disease characteristics.**

**Abbreviations:** V, bortezomib; M, melphalan; P, prednisone; T, thalidomide; D, dexamethasone; S, siltuximab; R/L, lenalidomide; MEL100, reduced-intensity stem cell transplantation using melphalan 100 mg/m<sup>2</sup>; Ld continuous, lenalidomide plus dexamethasone in 28-day cycles until disease progression; Ld 18 cycles, lenalidomide plus dexamethasone for 18 cycles; Ld 9 cycles, lenalidomide plus dexamethasone for 9 cycles.

|                     |                     |                     |                     |                     |                     |                      |                     |                     |                     |                     |                     |                     |                     |                     |                     |                     |
|---------------------|---------------------|---------------------|---------------------|---------------------|---------------------|----------------------|---------------------|---------------------|---------------------|---------------------|---------------------|---------------------|---------------------|---------------------|---------------------|---------------------|
| CPR                 | 0.37<br>(0.16-0.86) | 0.29<br>(0.14-0.59) | 0.61<br>(0.44-0.84) | 0.29<br>(0.14-0.58) | 0.47<br>(0.23-0.94) | 2.08<br>(1.25-3.45)  | 0.78<br>(0.56-1.11) | 0.78<br>(0.49-1.24) | 0.44<br>(0.22-0.87) | 0.78<br>(0.48-1.26) | 1.05<br>(0.52-2.15) | 0.45<br>(0.22-0.91) | 0.4<br>(0.21-0.75)  | 0.28<br>(0.14-0.58) | 0.33<br>(0.17-0.64) | 0.33<br>(0.17-0.65) |
| 2.68<br>(1.17-6.15) | CTD                 | 0.78<br>(0.34-1.77) | 1.63<br>(0.73-3.68) | 0.76<br>(0.34-1.73) | 1.25<br>(0.55-2.82) | 5.56<br>(2.88-10.75) | 2.1<br>(0.99-4.48)  | 2.09<br>(1.02-4.27) | 1.18<br>(0.53-2.63) | 2.08<br>(1.02-4.22) | 2.82<br>(1.23-6.45) | 1.21<br>(0.54-2.73) | 1.06<br>(0.49-2.28) | 0.76<br>(0.33-1.74) | 0.89<br>(0.41-1.95) | 0.89<br>(0.4-1.96)  |
| 3.44<br>(1.7-6.93)  | 1.28<br>(0.57-2.91) | Ld 18<br>cycles     | 2.1<br>(1.06-4.14)  | 0.98<br>(0.85-1.12) | 1.61<br>(1.11-2.32) | 7.14<br>(4.39-11.6)  | 2.7<br>(1.46-4.97)  | 2.68<br>(1.53-4.68) | 1.52<br>(1.29-1.79) | 2.67<br>(1.54-4.63) | 3.62<br>(1.8-7.26)  | 1.55<br>(0.78-3.06) | 1.36<br>(0.73-2.53) | 0.97<br>(0.48-1.96) | 1.14<br>(0.6-2.18)  | 1.14<br>(0.59-2.19) |
| 1.64<br>(1.19-2.26) | 0.61<br>(0.27-1.38) | 0.48<br>(0.24-0.94) | Ld 9<br>cycles      | 0.47<br>(0.24-0.92) | 0.77<br>(0.39-1.5)  | 3.4<br>(2.12-5.47)   | 1.28<br>(0.96-1.73) | 1.28<br>(0.83-1.96) | 0.72<br>(0.37-1.4)  | 1.27<br>(0.82-1.99) | 1.72<br>(0.87-3.44) | 0.74<br>(0.38-1.45) | 0.65<br>(0.35-1.2)  | 0.46<br>(0.23-0.93) | 0.54<br>(0.29-1.03) | 0.54<br>(0.28-1.04) |
| 3.5<br>(1.74-7.07)  | 1.31<br>(0.58-2.97) | 1.02<br>(0.89-1.17) | 2.14<br>(1.09-4.22) | Ld<br>continuous    | 1.64<br>(1.13-2.36) | 7.28<br>(4.48-11.83) | 2.75<br>(1.49-5.07) | 2.73<br>(1.56-4.78) | 1.55<br>(1.31-1.82) | 2.72<br>(1.57-4.72) | 3.69<br>(1.84-7.41) | 1.58<br>(0.8-3.12)  | 1.39<br>(0.74-2.58) | 0.99<br>(0.49-2)    | 1.17<br>(0.61-2.22) | 1.16<br>(0.6-2.23)  |
| 2.14<br>(1.07-4.3)  | 0.8<br>(0.35-1.81)  | 0.62<br>(0.43-0.9)  | 1.31<br>(0.67-2.56) | 0.61<br>(0.42-0.88) | MEL100              | 4.45<br>(2.76-7.17)  | 1.68<br>(0.92-3.08) | 1.67<br>(0.96-2.9)  | 0.94<br>(0.68-1.31) | 1.66<br>(0.97-2.86) | 2.25<br>(1.13-4.5)  | 0.97<br>(0.49-1.9)  | 0.85<br>(0.46-1.57) | 0.6<br>(0.3-1.22)   | 0.71<br>(0.38-1.35) | 0.71<br>(0.37-1.36) |
| 0.48<br>(0.29-0.8)  | 0.18<br>(0.09-0.35) | 0.14<br>(0.09-0.23) | 0.29<br>(0.18-0.47) | 0.14<br>(0.08-0.22) | 0.22<br>(0.14-0.36) | MP                   | 0.38<br>(0.26-0.55) | 0.38<br>(0.28-0.49) | 0.21<br>(0.13-0.34) | 0.37<br>(0.29-0.48) | 0.51<br>(0.31-0.84) | 0.22<br>(0.13-0.35) | 0.19<br>(0.13-0.28) | 0.14<br>(0.08-0.23) | 0.16<br>(0.11-0.24) | 0.16<br>(0.1-0.25)  |
| 1.27<br>(0.9-1.8)   | 0.48<br>(0.22-1.01) | 0.37<br>(0.2-0.68)  | 0.78<br>(0.58-1.05) | 0.36<br>(0.2-0.67)  | 0.6<br>(0.33-1.09)  | 2.65<br>(1.83-3.84)  | MPR                 | 0.99<br>(0.73-1.35) | 0.56<br>(0.31-1.01) | 0.99<br>(0.71-1.38) | 1.34<br>(0.72-2.5)  | 0.57<br>(0.31-1.05) | 0.5<br>(0.29-0.86)  | 0.36<br>(0.19-0.68) | 0.42<br>(0.24-0.74) | 0.42<br>(0.24-0.75) |
| 1.28<br>(0.81-2.04) | 0.48<br>(0.23-0.98) | 0.37<br>(0.21-0.65) | 0.78<br>(0.51-1.2)  | 0.37<br>(0.21-0.64) | 0.6<br>(0.35-1.04)  | 2.66<br>(2.02-3.51)  | 1.01<br>(0.74-1.37) | MPR-R               | 0.57<br>(0.33-0.97) | 1<br>(0.86-1.16)    | 1.35<br>(0.76-2.39) | 0.58<br>(0.33-1)    | 0.51<br>(0.31-0.82) | 0.36<br>(0.2-0.65)  | 0.43<br>(0.26-0.71) | 0.42<br>(0.25-0.71) |
| 2.27<br>(1.15-4.48) | 0.85<br>(0.38-1.89) | 0.66<br>(0.56-0.78) | 1.38<br>(0.72-2.67) | 0.65<br>(0.55-0.76) | 1.06<br>(0.76-1.47) | 4.71<br>(2.98-7.43)  | 1.78<br>(0.99-3.2)  | MPT                 | 1.77<br>(1.04-3.01) | 1.76<br>(1.04-2.98) | 2.39<br>(1.21-4.7)  | 1.02<br>(0.53-1.98) | 0.9<br>(0.49-1.63)  | 0.64<br>(0.32-1.27) | 0.75<br>(0.4-1.4)   | 0.75<br>(0.4-1.41)  |
| 1.29<br>(0.8-2.08)  | 0.48<br>(0.24-0.98) | 0.37<br>(0.22-0.65) | 0.79<br>(0.5-1.23)  | 0.37<br>(0.21-0.64) | 0.6<br>(0.35-1.04)  | 2.67<br>(2.06-3.46)  | 1.01<br>(0.72-1.41) | 1<br>(0.87-1.16)    | 0.57<br>(0.34-0.96) | MPT-T               | 1.36<br>(0.77-2.38) | 0.58<br>(0.34-1)    | 0.51<br>(0.32-0.81) | 0.36<br>(0.21-0.64) | 0.43<br>(0.26-0.7)  | 0.43<br>(0.26-0.71) |
| 0.95<br>(0.47-1.94) | 0.35<br>(0.16-0.81) | 0.28<br>(0.14-0.55) | 0.58<br>(0.29-1.16) | 0.27<br>(0.14-0.54) | 0.44<br>(0.22-0.89) | 1.97<br>(1.2-3.25)   | 0.75<br>(0.4-1.39)  | 0.74<br>(0.42-1.31) | 0.42<br>(0.21-0.82) | 0.74<br>(0.42-1.3)  | TD                  | 0.43<br>(0.21-0.86) | 0.38<br>(0.2-0.71)  | 0.27<br>(0.13-0.55) | 0.32<br>(0.16-0.61) | 0.31<br>(0.16-0.61) |
| 2.22<br>(1.1-4.45)  | 0.83<br>(0.37-1.87) | 0.65<br>(0.33-1.27) | 1.35<br>(0.69-2.65) | 0.63<br>(0.32-1.25) | 1.04(0.53-<br>2.04) | 4.6<br>(2.86-7.42)   | 1.74<br>(0.95-3.18) | 1.73<br>(1-3)       | 0.98<br>(0.51-1.89) | 1.72<br>(1-2.96)    | 2.33<br>(1.17-4.66) | VD                  | 0.88<br>(0.67-1.15) | 0.63<br>(0.41-0.96) | 0.74<br>(0.54-1.01) | 0.73<br>(0.56-0.95) |
| 2.53<br>(1.33-4.79) | 0.94<br>(0.44-2.03) | 0.74<br>(0.39-1.37) | 1.54<br>(0.84-2.85) | 0.72<br>(0.39-1.34) | 1.18<br>(0.64-2.19) | 5.25<br>(3.55-7.76)  | 1.98<br>(1.16-3.4)  | 1.97<br>(1.22-3.18) | 1.12<br>(0.61-2.03) | 1.96<br>(1.23-3.14) | 2.66<br>(1.41-5.02) | 1.14<br>(0.87-1.5)  | VMP                 | 0.71<br>(0.52-0.99) | 0.84<br>(0.72-0.99) | 0.84<br>(0.68-1.03) |
| 3.54<br>(1.73-7.26) | 1.32<br>(0.57-3.04) | 1.03<br>(0.51-2.08) | 2.16<br>(1.08-4.33) | 1.01<br>(0.5-2.04)  | 1.65<br>(0.82-3.32) | 7.35<br>(4.42-12.23) | 2.78<br>(1.48-5.21) | 2.76<br>(1.55-4.92) | 1.56<br>(0.79-3.09) | 2.75<br>(1.55-4.87) | 3.73<br>(1.83-7.61) | 1.6<br>(1.04-2.45)  | 1.4<br>(1.01-1.94)  | VMPS                | 1.18<br>(0.82-1.69) | 1.17<br>(0.8-1.72)  |
| 3<br>(1.55-5.81)    | 1.12<br>(0.51-2.46) | 0.87<br>(0.46-1.66) | 1.84<br>(0.97-3.46) | 0.86<br>(0.45-1.63) | 1.4<br>(0.74-2.66)  | 6.24<br>(4.09-9.52)  | 2.36<br>(1.34-4.14) | 2.34<br>(1.41-3.88) | 1.33<br>(0.71-2.47) | 2.34<br>(1.42-3.83) | 3.16<br>(1.64-6.09) | 1.36<br>(0.99-1.86) | 1.19<br>(1.01-1.4)  | 0.85<br>(0.59-1.22) | VMPT-VT             | 0.99<br>(0.77-1.29) |
| 3.02<br>(1.54-5.92) | 1.13<br>(0.51-2.5)  | 0.88<br>(0.46-1.69) | 1.85<br>(0.97-3.53) | 0.86<br>(0.45-1.66) | 1.41<br>(0.74-2.71) | 6.28<br>(4.04-9.76)  | 2.37<br>(1.33-4.22) | 2.36<br>(1.4-3.96)  | 1.33<br>(0.71-2.52) | 2.35<br>(1.41-3.92) | 3.18<br>(1.63-6.2)  | 1.36<br>(1.05-1.77) | 1.2<br>(0.97-1.47)  | 0.85<br>(0.58-1.26) | 1.01<br>(0.77-1.31) | VTD                 |

**Supplementary table 4** Effect of initial regimens for elderly MM patients on CR/nCR rates. Therapies are reported in alphabetical order. The values in the matrix represent the weighted relative risk (RR) and 95% confidence interval for the row-defining treatment vs. the column-defining treatment.

**Abbreviations:** V, bortezomib; M, melphalan; P, prednisone; T, thalidomide; D, dexamethasone; S, siltuximab; R/L, lenalidomide; MEL100, reduced-intensity stem cell transplantation using melphalan 100 mg/m<sup>2</sup>; Ld continuous, lenalidomide plus dexamethasone in 28-day cycles until disease progression; Ld 18 cycles, lenalidomide plus dexamethasone for 18 cycles; Ld 9 cycles, lenalidomide plus dexamethasone for 9 cycles.

| Outcomes |                             |                            |                                    |                             |
|----------|-----------------------------|----------------------------|------------------------------------|-----------------------------|
| Rank     | CR/nCR                      | ORR                        | PFS                                | OS                          |
| 1st      | VMPS<br>(P=0.8711)          | Ld continuous<br>(P=0.951) | Ld continuous<br>(P=0.9506)        | Ld continuous<br>(P=0.9384) |
| 2nd      | Ld continuous<br>(P=0.8549) | Ld 18 cycles<br>(P=0.9096) | MPR-R<br>(P=0.8012)                | Ld 18 cycles<br>(P=0.8762)  |
| 3rd      | Ld 18cycles<br>(P=0.8405)   | VMPT-VT<br>(P=0.7922)      | MPT<br>(P=0.7977)                  | MPT<br>(P=0.8061)           |
| 4th      | VTD<br>(P=0.7796)           | VMPS<br>(P=0.7851)         | Ld 18 cycles<br>(P=0.7404)         | VMPT-VT<br>(P=0.7506)       |
| 5th      | VMPT-VT<br>(P=0.7766)       | VTD<br>(P=0.7382)          | MPT-T<br>(P=0.6226)                | VMP<br>(P=0.7461)           |
| 6th      | CTD<br>(P=0.6841)           | MPT<br>(P=0.6969)          | MEL100<br>(P=0.5093)               | VTD<br>(P=0.538)            |
| 7th      | VMP<br>(P=0.6263)           | CTD<br>(P=0.6368)          | MPR<br>(P=0.4093)                  | VD<br>(P=0.5269)            |
| 8th      | MPT<br>(P=0.5641)           | VD<br>(P=0.6066)           | MP<br>(P=0.3197)                   | MPR-R<br>(P=0.4844)         |
| 9th      | VD<br>(P=0.5349)            | VMP<br>(P=0.5902)          | Ld 9 cycles<br>(P=0.246)           | MEL100<br>(P=0.4253)        |
| 10th     | MEL100<br>(P=0.5321)        | MEL100<br>(P=0.4491)       | CPR<br>(P=0.2409)                  | MPT-T<br>(P=0.41)           |
| 11th     | Ld 9 cycles<br>(P=0.4175)   | MPR-R<br>(P=0.3346)        | CTD<br>(P=0.1959)                  | MP<br>(P=0.387)             |
| 12th     | MPR-R<br>(P=0.26)           | MPT-T<br>(P=0.3019)        | TD<br>(P=0.1665)                   | CTD<br>(P=0.2759)           |
| 13th     | MPR<br>(P=0.2528)           | Ld 9 cycles<br>(P=0.2364)  | VMPT-VT <sup>#</sup><br>(P=0.8759) | MPR<br>(P=0.2692)           |
| 14th     | MPT-T<br>(P=0.2358)         | TD<br>(P=0.1995)           | VMPS <sup>#</sup><br>(P=0.5251)    | CPR<br>(P=0.2553)           |
| 15th     | CPR<br>(p=0.1377)           | MPR<br>(P=0.1616)          | VMP <sup>#</sup><br>(P=0.4522)     | Ld 9 cycles<br>(P=0.2267)   |
| 16th     | TD<br>(P=0.1311)            | CPR<br>(P=0.1131)          | VTD <sup>#</sup><br>(P=0.3612)     | TD<br>(P=0.084)             |
| 17th     | MP<br>(P=0.0009)            | MP<br>(P=0.0007)           | VD <sup>#</sup><br>(P=0.2856)      | NA                          |

**Supplementary table 5** initial treatments for the elderly patients with the highest probability of ranking from best to worst (1st to 15th) for the outcomes of interest.

**Abbreviations:** V, bortezomib; M, melphalan; P, prednisone; T, thalidomide; D, dexamethasone; S, siltuximab; R/L, lenalidomide; MEL100, reduced-intensity stem cell transplantation using melphalan 100 mg/m<sup>2</sup>; Ld continuous, lenalidomide plus dexamethasone in 28-day cycles until disease progression; Ld 18 cycles, lenalidomide plus dexamethasone for 18 cycles; Ld 9 cycles, lenalidomide plus dexamethasone for 9 cycles.

**Note:** “#” means the ranks of treatments within the second subgroup regarding PFS

|                     |                     |                     |                     |                     |                     |                     |                     |                     |                     |                     |                     |                     |                     |                     |                     |                     |
|---------------------|---------------------|---------------------|---------------------|---------------------|---------------------|---------------------|---------------------|---------------------|---------------------|---------------------|---------------------|---------------------|---------------------|---------------------|---------------------|---------------------|
| CPR                 | 0.66<br>(0.51-0.84) | 0.53<br>(0.4-0.71)  | 0.92<br>(0.82-1.04) | 0.52<br>(0.39-0.69) | 0.76<br>(0.57-1)    | 1.27<br>(1.04-1.55) | 0.96<br>(0.85-1.09) | 0.85<br>(0.71-1.03) | 0.63<br>(0.48-0.82) | 0.86<br>(0.71-1.05) | 0.94<br>(0.71-1.24) | 0.66<br>(0.5-0.88)  | 0.66<br>(0.52-0.85) | 0.6<br>(0.44-0.81)  | 0.6<br>(0.47-0.78)  | 0.62<br>(0.48-0.81) |
| 1.53<br>(1.19-1.96) | CTD                 | 0.81<br>(0.63-1.05) | 1.4<br>(1.1-1.8)    | 0.79<br>(0.62-1.02) | 1.15<br>(0.9-1.48)  | 1.94<br>(1.67-2.27) | 1.46<br>(1.18-1.82) | 1.3<br>(1.08-1.57)  | 0.96<br>(0.75-1.22) | 1.32<br>(1.1-1.58)  | 1.43<br>(1.12-1.84) | 1.01<br>(0.78-1.3)  | 1.01<br>(0.81-1.25) | 0.92<br>(0.69-1.21) | 0.92<br>(0.73-1.16) | 0.95<br>(0.75-1.19) |
| 1.88<br>(1.41-2.49) | 1.23<br>(0.95-1.58) | Ld 18<br>cycles     | 1.73<br>(1.31-2.29) | 0.98<br>(0.91-1.05) | 1.42<br>(1.16-1.74) | 2.39<br>(1.95-2.92) | 1.8<br>(1.4-2.32)   | 1.6<br>(1.28-2.01)  | 1.18<br>(1.08-1.28) | 1.62<br>(1.3-2.03)  | 1.76<br>(1.33-2.34) | 1.24<br>(0.93-1.65) | 1.24<br>(0.97-1.59) | 1.13<br>(0.83-1.53) | 1.13<br>(0.87-1.47) | 1.16<br>(0.89-1.52) |
| 1.09<br>(0.96-1.23) | 0.71<br>(0.56-0.91) | 0.58<br>(0.44-0.77) | Ld 9<br>cycles      | 0.57<br>(0.43-0.75) | 0.82<br>(0.62-1.09) | 1.38<br>(1.14-1.68) | 1.04<br>(0.93-1.17) | 0.93<br>(0.77-1.11) | 0.68<br>(0.52-0.89) | 0.94<br>(0.78-1.13) | 1.02<br>(0.77-1.35) | 0.72<br>(0.54-0.95) | 0.72<br>(0.56-0.92) | 0.65<br>(0.48-0.88) | 0.66<br>(0.51-0.85) | 0.67<br>(0.52-0.88) |
| 1.92<br>(1.45-2.55) | 1.26<br>(0.98-1.62) | 1.02<br>(0.95-1.1)  | 1.77<br>(1.34-2.34) | Ld<br>continuous    | 1.45<br>(1.19-1.78) | 2.45<br>(2-2.99)    | 1.84<br>(1.43-2.38) | 1.64<br>(1.31-2.06) | 1.21<br>(1.11-1.31) | 1.66<br>(1.33-2.08) | 1.8<br>(1.36-2.39)  | 1.27<br>(0.96-1.68) | 1.27<br>(0.99-1.63) | 1.15<br>(0.85-1.56) | 1.16<br>(0.89-1.5)  | 1.19<br>(0.91-1.56) |
| 1.32<br>(1-1.75)    | 0.87<br>(0.67-1.12) | 0.7<br>(0.58-0.86)  | 1.22<br>(0.92-1.61) | 0.69<br>(0.56-0.84) | MEL100              | 1.68<br>(1.38-2.06) | 1.27<br>(0.98-1.63) | 1.13<br>(0.9-1.41)  | 0.83<br>(0.69-1)    | 1.14<br>(0.92-1.43) | 1.24<br>(0.94-1.64) | 0.87<br>(0.66-1.16) | 0.87<br>(0.68-1.12) | 0.79<br>(0.58-1.08) | 0.8<br>(0.62-1.03)  | 0.82<br>(0.63-1.07) |
| 0.79<br>(0.64-0.96) | 0.51<br>(0.44-0.6)  | 0.42<br>(0.34-0.51) | 0.72<br>(0.6-0.88)  | 0.41<br>(0.33-0.5)  | 0.59<br>(0.49-0.73) | MP                  | 0.75<br>(0.64-0.88) | 0.67<br>(0.6-0.74)  | 0.49<br>(0.41-0.59) | 0.68<br>(0.62-0.75) | 0.74<br>(0.61-0.9)  | 0.52<br>(0.43-0.63) | 0.52<br>(0.45-0.6)  | 0.47<br>(0.37-0.59) | 0.47<br>(0.4-0.56)  | 0.49<br>(0.41-0.58) |
| 1.04<br>(0.92-1.18) | 0.68<br>(0.55-0.85) | 0.56<br>(0.43-0.72) | 0.96<br>(0.85-1.08) | 0.54<br>(0.42-0.7)  | 0.79<br>(0.61-1.02) | 1.33<br>(1.14-1.55) | MPR                 | 0.89<br>(0.78-1.02) | 0.65<br>(0.51-0.83) | 0.9<br>(0.78-1.04)  | 0.98<br>(0.76-1.26) | 0.69<br>(0.54-0.89) | 0.69<br>(0.56-0.86) | 0.63<br>(0.47-0.83) | 0.63<br>(0.5-0.79)  | 0.65<br>(0.51-0.82) |
| 1.17<br>(0.98-1.41) | 0.77<br>(0.64-0.93) | 0.62<br>(0.5-0.78)  | 1.08<br>(0.9-1.29)  | 0.61<br>(0.49-0.77) | 0.89<br>(0.71-1.11) | 1.49<br>(1.34-1.66) | 1.12<br>(0.98-1.29) | MPR-R               | 0.74<br>(0.6-0.91)  | 1.01<br>(0.95-1.08) | 1.1<br>(0.88-1.38)  | 0.77<br>(0.62-0.97) | 0.78<br>(0.65-0.93) | 0.7<br>(0.55-0.91)  | 0.71<br>(0.58-0.86) | 0.73<br>(0.59-0.89) |
| 1.59<br>(1.22-2.09) | 1.04<br>(0.82-1.33) | 0.85<br>(0.78-0.92) | 1.47<br>(1.12-1.92) | 0.83<br>(0.76-0.9)  | 1.21<br>(1-1.45)    | 2.03<br>(1.69-2.44) | 1.53<br>(1.2-1.94)  | 1.36<br>(1.1-1.68)  | MPT                 | 1.38<br>(1.12-1.7)  | 1.5<br>(1.14-1.96)  | 1.05<br>(0.8-1.38)  | 1.05<br>(0.83-1.34) | 0.96<br>(0.71-1.28) | 0.96<br>(0.75-1.23) | 0.99<br>(0.77-1.27) |
| 1.16<br>(0.96-1.4)  | 0.76<br>(0.63-0.91) | 0.62<br>(0.49-0.77) | 1.06<br>(0.88-1.28) | 0.6<br>(0.48-0.75)  | 0.87<br>(0.7-1.09)  | 1.47<br>(1.34-1.62) | 1.11<br>(0.96-1.28) | 0.99<br>(0.93-1.05) | 0.73<br>(0.59-0.89) | MPT-T               | 1.09<br>(0.87-1.35) | 0.76<br>(0.61-0.95) | 0.76<br>(0.64-0.91) | 0.69<br>(0.54-0.89) | 0.7<br>(0.58-0.85)  | 0.72<br>(0.59-0.88) |
| 1.06<br>(0.8-1.41)  | 0.7<br>(0.54-0.9)   | 0.57<br>(0.43-0.75) | 0.98<br>(0.74-1.29) | 0.55<br>(0.42-0.73) | 0.81<br>(0.61-1.07) | 1.36<br>(1.11-1.65) | 1.02<br>(0.79-1.31) | 0.91<br>(0.73-1.14) | 0.67<br>(0.51-0.87) | 0.92<br>(0.74-1.15) | TD                  | 0.7<br>(0.53-0.93)  | 0.7<br>(0.55-0.9)   | 0.64<br>(0.47-0.87) | 0.64<br>(0.5-0.83)  | 0.66<br>(0.51-0.86) |
| 1.51<br>(1.14-2.01) | 0.99<br>(0.77-1.28) | 0.81<br>(0.61-1.07) | 1.39<br>(1.05-1.84) | 0.79<br>(0.59-1.04) | 1.14<br>(0.86-1.52) | 1.93<br>(1.58-2.35) | 1.45<br>(1.13-1.87) | 1.29<br>(1.03-1.62) | 0.95<br>(0.72-1.24) | 1.31<br>(1.05-1.63) | 1.42<br>(1.07-1.88) | VD                  | 1<br>(0.88-1.14)    | 0.91<br>(0.73-1.13) | 0.91<br>(0.79-1.06) | 0.94<br>(0.83-1.06) |
| 1.51<br>(1.18-1.94) | 0.99<br>(0.8-1.23)  | 0.81<br>(0.63-1.04) | 1.39<br>(1.09-1.78) | 0.79<br>(0.61-1.01) | 1.14<br>(0.89-1.47) | 1.93<br>(1.66-2.24) | 1.45<br>(1.17-1.8)  | 1.29<br>(1.07-1.55) | 0.95<br>(0.75-1.2)  | 1.31<br>(1.09-1.56) | 1.42<br>(1.11-1.82) | 1<br>(0.88-1.14)    | VMP                 | 0.91<br>(0.76-1.08) | 0.91<br>(0.85-0.98) | 0.94<br>(0.86-1.03) |
| 1.67<br>(1.23-2.26) | 1.09<br>(0.83-1.44) | 0.89<br>(0.65-1.21) | 1.54<br>(1.14-2.08) | 0.87<br>(0.64-1.18) | 1.26<br>(0.93-1.71) | 2.12<br>(1.69-2.68) | 1.6<br>(1.21-2.11)  | 1.42<br>(1.1-1.83)  | 1.05<br>(0.78-1.4)  | 1.44<br>(1.12-1.85) | 1.57<br>(1.16-2.12) | 1.1<br>(0.88-1.37)  | 1.1<br>(0.92-1.32)  | VMPS                | 1.01<br>(0.83-1.22) | 1.03<br>(0.85-1.26) |
| 1.66<br>(1.28-2.15) | 1.09<br>(0.87-1.36) | 0.88<br>(0.68-1.15) | 1.53<br>(1.18-1.97) | 0.86<br>(0.66-1.12) | 1.25<br>(0.97-1.63) | 2.11<br>(1.79-2.49) | 1.59<br>(1.27-2)    | 1.41<br>(1.16-1.72) | 1.04<br>(0.81-1.33) | 1.43<br>(1.18-1.74) | 1.56<br>(1.2-2.01)  | 1.1<br>(0.94-1.27)  | 1.1<br>(1.02-1.18)  | 0.99<br>(0.82-1.2)  | VMPT-VT             | 1.03<br>(0.91-1.16) |
| 1.61<br>(1.24-2.1)  | 1.06<br>(0.84-1.33) | 0.86<br>(0.66-1.12) | 1.48<br>(1.14-1.93) | 0.84<br>(0.64-1.09) | 1.22<br>(0.94-1.59) | 2.05<br>(1.72-2.44) | 1.55<br>(1.22-1.95) | 1.38<br>(1.12-1.69) | 1.01<br>(0.79-1.3)  | 1.39<br>(1.14-1.7)  | 1.51<br>(1.16-1.97) | 1.07<br>(0.94-1.21) | 1.07<br>(0.97-1.17) | 0.97<br>(0.79-1.18) | 0.97<br>(0.87-1.09) | VTD                 |

**Supplementary table 6** Effect of initial regimens for elderly MM patients on ORR rates. Therapies are reported in alphabetical order. The values in the matrix represent the weighted relative risk (RR) and 95% confidence interval for the row-defining treatment vs. the column-defining treatment.

**Abbreviations:** V, bortezomib; M, melphalan; P, prednisone; T, thalidomide; D, dexamethasone; S, siltuximab; R/L, lenalidomide; MEL100, reduced-intensity stem cell transplantation using melphalan 100 mg/m<sup>2</sup>; Ld continuous, lenalidomide plus dexamethasone in 28-day cycles until disease progression; Ld 18 cycles, lenalidomide plus dexamethasone for 18 cycles; Ld 9 cycles, lenalidomide plus dexamethasone for 9 cycles.

|                  |                  |                  |                  |                  |                  |                  |                  |                  |                  |                  |                  |
|------------------|------------------|------------------|------------------|------------------|------------------|------------------|------------------|------------------|------------------|------------------|------------------|
| CPR              | 0.95 (0.39-2.31) | 1.99 (0.76-5.23) | 1.01 (0.6-1.68)  | 2.84 (1.08-7.5)  | 1.43 (0.62-3.3)  | 1.16 (0.57-2.38) | 1.25 (0.72-2.18) | 2 (0.97-4.11)    | 2.05 (0.91-4.63) | 1.62 (0.77-3.37) | 0.89 (0.35-2.26) |
| 1.05 (0.43-2.54) | CTD              | 2.08 (0.9-4.81)  | 1.06 (0.44-2.56) | 2.98 (1.29-6.89) | 1.5 (0.76-2.96)  | 1.22 (0.72-2.06) | 1.31 (0.66-2.62) | 2.09 (1.11-3.95) | 2.15 (1.11-4.13) | 1.69 (0.94-3.06) | 0.94 (0.43-2.06) |
| 0.5 (0.19-1.32)  | 0.48 (0.21-1.11) | Ld 18 cycles     | 0.51 (0.19-1.33) | 1.43 (0.85-2.41) | 0.72 (0.35-1.48) | 0.59 (0.3-1.12)  | 0.63 (0.29-1.39) | 1 (0.48-2.12)    | 1.03 (0.61-1.73) | 0.81 (0.4-1.65)  | 0.45 (0.19-1.08) |
| 0.99 (0.6-1.66)  | 0.95 (0.39-2.3)  | 1.98 (0.75-5.2)  | Ld 9 cycles      | 2.82 (1.07-7.45) | 1.42 (0.62-3.28) | 1.16 (0.57-2.36) | 1.24 (0.71-2.17) | 1.98 (0.96-4.08) | 2.03 (0.9-4.6)   | 1.61 (0.77-3.35) | 0.89 (0.35-2.25) |
| 0.35 (0.13-0.93) | 0.34 (0.15-0.78) | 0.7 (0.42-1.18)  | 0.35 (0.13-0.94) | Ld continuous    | 0.5 (0.24-1.04)  | 0.41 (0.21-0.79) | 0.44 (0.2-0.98)  | 0.7 (0.33-1.49)  | 0.72 (0.43-1.22) | 0.57 (0.28-1.16) | 0.32 (0.13-0.76) |
| 0.7 (0.3-1.61)   | 0.67 (0.34-1.32) | 1.39 (0.67-2.86) | 0.7 (0.3-1.62)   | 1.99 (0.96-4.1)  | MEL100           | 0.81 (0.53-1.25) | 0.88 (0.47-1.64) | 1.4 (0.79-2.45)  | 1.43 (0.87-2.36) | 1.13 (0.67-1.89) | 0.63 (0.3-1.3)   |
| 0.86 (0.42-1.76) | 0.82 (0.49-1.38) | 1.71 (0.89-3.28) | 0.87 (0.42-1.77) | 2.44 (1.27-4.71) | 1.23 (0.8-1.9)   | MP               | 1.08 (0.69-1.69) | 1.72 (1.2-2.46)  | 1.76 (1.19-2.61) | 1.39 (1.05-1.83) | 0.77 (0.43-1.39) |
| 0.8 (0.46-1.39)  | 0.76 (0.38-1.52) | 1.59 (0.72-3.51) | 0.8 (0.46-1.4)   | 2.27 (1.02-5.03) | 1.14 (0.61-2.14) | 0.93 (0.59-1.46) | MPR              | 1.59 (1.01-2.53) | 1.63 (0.9-2.97)  | 1.29 (0.8-2.09)  | 0.71 (0.34-1.5)  |
| 0.5 (0.24-1.03)  | 0.48 (0.25-0.9)  | 1 (0.47-2.1)     | 0.5 (0.24-1.04)  | 1.42 (0.67-3.01) | 0.72 (0.41-1.26) | 0.58 (0.41-0.84) | 0.63 (0.4-0.99)  | MPR-R            | 1.02 (0.6-1.75)  | 0.81 (0.58-1.12) | 0.45 (0.22-0.89) |
| 0.49 (0.22-1.1)  | 0.47 (0.24-0.9)  | 0.97 (0.58-1.63) | 0.49 (0.22-1.11) | 1.39 (0.82-2.35) | 0.7 (0.42-1.15)  | 0.57 (0.38-0.84) | 0.61 (0.34-1.11) | 0.98 (0.57-1.67) | MPT              | 0.79 (0.49-1.28) | 0.44 (0.22-0.89) |
| 0.62 (0.3-1.29)  | 0.59 (0.33-1.07) | 1.23 (0.61-2.5)  | 0.62 (0.3-1.3)   | 1.76 (0.86-3.59) | 0.89 (0.53-1.48) | 0.72 (0.55-0.95) | 0.78 (0.48-1.26) | 1.24 (0.89-1.71) | 1.27 (0.78-2.05) | MPT-T            | 0.55(0.29-1.06)  |
| 1.12(0.44-2.82)  | 1.07 (0.48-2.34) | 2.22 (0.92-5.35) | 1.12 (0.45-2.84) | 3.17 (1.31-7.67) | 1.6 (0.77-3.32)  | 1.3 (0.72-2.34)  | 1.4 (0.67-2.94)  | 2.23 (1.12-4.45) | 2.29 (1.13-4.65) | 1.81 (0.94-3.46) | TD               |

**Supplementary table 7a** Effect of initial regimens for elderly MM patients on PFS of sub-network a. Therapies are reported in alphabetical order. The values in the matrix represent the weighted hazard ratio and 95% confidence interval for the row-defining treatment vs. the column-defining treatment

**Abbreviations:** V, bortezomib; M, melphalan; P, prednisone; T, thalidomide; D, dexamethasone; S, siltuximab; R/L; lenalidomide, MEL100, reduced-intensity stem cell transplantation using melphalan 100 mg/m<sup>2</sup>; Ld continuous, lenalidomide plus dexamethasone in 28-day cycles until disease progression; Ld 18 cycles, lenalidomide plus dexamethasone for 18 cycles, Ld 9 cycles, lenalidomide plus dexamethasone for 9 cycles.

|                  |                  |                  |                  |                  |
|------------------|------------------|------------------|------------------|------------------|
| VD               | 1.13 (0.69-1.85) | 1.21 (0.48-3.05) | 1.68 (0.81-3.52) | 1.06 (0.65-1.75) |
| 0.89 (0.54-1.45) | VMP              | 1.08 (0.49-2.34) | 1.49 (0.86-2.58) | 0.94 (0.64-1.38) |
| 0.82 (0.33-2.07) | 0.93 (0.43-2.02) | VMPS             | 1.39 (0.54-3.59) | 0.88 (0.37-2.08) |
| 0.59 (0.28-1.24) | 0.67 (0.39-1.16) | 0.72 (0.28-1.86) | VMPT-VT          | 0.63 (0.32-1.23) |
| 0.94 (0.57-1.55) | 1.06 (0.73-1.55) | 1.14 (0.48-2.71) | 1.58 (0.81-3.09) | VTD              |



**Supplementary table 7b** Effect of initial regimens for elderly MM patients on PFS of sub-network b. Therapies are reported in alphabetical order. The values in the matrix represent the weighted hazard ratio (HR) and 95% confidence interval for the row-defining treatment vs. the column-defining treatment.

**Abbreviations:** V, bortezomib; M, melphalan; P, prednisone; T, thalidomide; D, dexamethasone; S, siltuximab; R/L, lenalidomide; MEL100, reduced-intensity stem cell transplantation using melphalan 100 mg/m<sup>2</sup>; Ld continuous, lenalidomide plus dexamethasone in 28-day cycles until disease progression; Ld 18 cycles, lenalidomide plus dexamethasone for 18 cycles; Ld 9 cycles, lenalidomide plus dexamethasone for 9 cycles.

|                     |                     |                     |                     |                     |                     |                     |                     |                     |                     |                     |                     |                     |                     |                     |                     |
|---------------------|---------------------|---------------------|---------------------|---------------------|---------------------|---------------------|---------------------|---------------------|---------------------|---------------------|---------------------|---------------------|---------------------|---------------------|---------------------|
| CPR                 | 1.05<br>(0.6-1.87)  | 2.15<br>(1.16-3.97) | 0.95<br>(0.8-1.13)  | 2.4<br>(1.3-4.44)   | 1.14<br>(0.63-2.03) | 1.18<br>(0.69-2.03) | 1.02<br>(0.72-1.45) | 1.29<br>(0.76-2.16) | 1.88<br>(1.05-3.36) | 1.19 (0.7-2.03)     | 0.76 (0.4-1.48)     | 1.35<br>(0.68-2.71) | 1.7<br>(0.94-3.1)   | 1.85<br>(0.82-4.18) | 1.37<br>(0.72-2.61) |
| 0.95<br>(0.54-1.68) | CTD                 | 2.04<br>(1.44-2.89) | 0.9<br>(0.51-1.58)  | 2.28<br>(1.6-3.24)  | 1.08<br>(0.8-1.44)  | 1.12<br>(0.93-1.36) | 0.97<br>(0.62-1.52) | 1.22<br>(0.91-1.64) | 1.79<br>(1.34-2.38) | 1.13<br>(0.88-1.45) | 0.72<br>(0.47-1.11) | 1.28<br>(0.8-2.06)  | 1.62<br>(1.17-2.23) | 1.76<br>(0.93-3.33) | 1.3<br>(0.87-1.94)  |
| 0.47<br>(0.25-0.86) | 0.49<br>(0.35-0.7)  | Ld 18<br>cycles     | 0.44<br>(0.24-0.81) | 1.12<br>(0.91-1.37) | 0.53<br>(0.38-0.73) | 0.55<br>(0.41-0.74) | 0.48<br>(0.29-0.79) | 0.6<br>(0.41-0.87)  | 0.88<br>(0.72-1.07) | 0.55<br>(0.39-0.77) | 0.36<br>(0.22-0.58) | 0.63<br>(0.37-1.07) | 0.79<br>(0.54-1.17) | 0.86<br>(0.44-1.7)  | 0.64<br>(0.4-1.01)  |
| 1.05<br>(0.88-1.26) | 1.11<br>(0.63-1.96) | 2.27<br>(1.23-4.17) | Ld 9<br>cycles      | 2.53<br>(1.37-4.66) | 1.2<br>(0.67-2.13)  | 1.25<br>(0.73-2.13) | 1.08<br>(0.77-1.52) | 1.35<br>(0.81-2.27) | 1.99<br>(1.12-3.53) | 1.25<br>(0.74-2.13) | 0.81<br>(0.42-1.55) | 1.43<br>(0.72-2.84) | 1.8<br>(0.99-3.25)  | 1.95<br>(0.87-4.39) | 1.44<br>(0.76-2.74) |
| 0.42<br>(0.23-0.77) | 0.44<br>(0.31-0.62) | 0.9<br>(0.73-1.1)   | 0.4<br>(0.21-0.73)  | Ld<br>continuous    | 0.47<br>(0.34-0.66) | 0.49<br>(0.37-0.66) | 0.43<br>(0.26-0.71) | 0.54<br>(0.37-0.78) | 0.78<br>(0.64-0.96) | 0.49<br>(0.35-0.7)  | 0.32<br>(0.2-0.52)  | 0.56<br>(0.33-0.96) | 0.71<br>(0.48-1.05) | 0.77<br>(0.39-1.52) | 0.57<br>(0.36-0.9)  |
| 0.88<br>(0.49-1.58) | 0.93<br>(0.69-1.24) | 1.89<br>(1.37-2.62) | 0.84<br>(0.47-1.49) | 2.12<br>(1.52-2.93) | MEL100              | 1.04<br>(0.84-1.3)  | 0.9<br>(0.57-1.43)  | 1.13<br>(0.82-1.55) | 1.66<br>(1.28-2.14) | 1.05<br>(0.79-1.38) | 0.67<br>(0.43-1.05) | 1.19<br>(0.73-1.94) | 1.5<br>(1.07-2.11)  | 1.63<br>(0.85-3.12) | 1.21<br>(0.79-1.83) |
| 0.84<br>(0.49-1.45) | 0.89<br>(0.74-1.08) | 1.81<br>(1.35-2.44) | 0.8<br>(0.47-1.37)  | 2.03<br>(1.51-2.73) | 0.96<br>(0.77-1.2)  | MP                  | 0.86<br>(0.57-1.3)  | 1.08<br>(0.87-1.36) | 1.59<br>(1.28-1.98) | 1<br>(0.85-1.18)    | 0.65<br>(0.44-0.94) | 1.14<br>(0.74-1.77) | 1.44<br>(1.11-1.86) | 1.56<br>(0.85-2.88) | 1.16<br>(0.81-1.65) |
| 0.98<br>(0.69-1.39) | 1.03<br>(0.66-1.62) | 2.1<br>(1.27-3.48)  | 0.93<br>(0.66-1.31) | 2.35<br>(1.42-3.89) | 1.11<br>(0.7-1.77)  | 1.16<br>(0.77-1.74) | MPR                 | 1.26<br>(0.85-1.85) | 1.84<br>(1.16-2.92) | 1.16<br>(0.77-1.74) | 0.75<br>(0.43-1.31) | 1.32<br>(0.73-2.41) | 1.67<br>(1.03-2.7)  | 1.81<br>(0.87-3.78) | 1.34<br>(0.78-2.3)  |
| 0.78<br>(0.46-1.31) | 0.82<br>(0.61-1.1)  | 1.67<br>(1.15-2.43) | 0.74<br>(0.44-1.24) | 1.87<br>(1.29-2.72) | 0.88<br>(0.64-1.21) | 0.92<br>(0.74-1.16) | 0.8<br>(0.54-1.17)  | MPR-R               | 1.47<br>(1.07-2.01) | 0.92<br>(0.77-1.11) | 0.59<br>(0.38-0.93) | 1.05<br>(0.64-1.72) | 1.33<br>(0.94-1.87) | 1.44<br>(0.75-2.76) | 1.07<br>(0.7-1.62)  |
| 0.53<br>(0.3-0.95)  | 0.56<br>(0.42-0.75) | 1.14<br>(0.94-1.39) | 0.5<br>(0.28-0.9)   | 1.28<br>(1.04-1.56) | 0.6<br>(0.47-0.78)  | 0.63<br>(0.51-0.78) | 0.54<br>(0.34-0.86) | 0.68<br>(0.5-0.93)  | MPT                 | 0.63<br>(0.48-0.83) | 0.41<br>(0.26-0.63) | 0.72<br>(0.44-1.17) | 0.91<br>(0.65-1.27) | 0.98<br>(0.51-1.88) | 0.73<br>(0.48-1.1)  |
| 0.84<br>(0.49-1.44) | 0.89<br>(0.69-1.14) | 1.81<br>(1.29-2.54) | 0.8<br>(0.47-1.36)  | 2.02<br>(1.44-2.84) | 0.96<br>(0.72-1.26) | 1<br>(0.84-1.18)    | 0.86<br>(0.57-1.29) | 1.08<br>(0.9-1.3)   | 1.58<br>(1.21-2.08) | MPT-T               | 0.64<br>(0.42-0.97) | 1.14<br>(0.71-1.82) | 1.43<br>(1.05-1.95) | 1.56<br>(0.83-2.93) | 1.15<br>(0.78-1.7)  |
| 1.31<br>(0.68-2.53) | 1.38<br>(0.9-2.11)  | 2.81<br>(1.74-4.55) | 1.24<br>(0.64-2.39) | 3.14<br>(1.94-5.09) | 1.49<br>(0.96-2.31) | 1.55<br>(1.06-2.27) | 1.34<br>(0.77-2.34) | 1.68<br>(1.08-2.62) | 2.46<br>(1.59-3.82) | 1.55<br>(1.03-2.36) | TD                  | 1.77<br>(0.99-3.16) | 2.23<br>(1.41-3.53) | 2.42<br>(1.18-4.98) | 1.79<br>(1.06-3.01) |
| 0.74<br>(0.37-1.48) | 0.78<br>(0.48-1.25) | 1.59<br>(0.94-2.69) | 0.7<br>(0.35-1.4)   | 1.77<br>(1.05-3.01) | 0.84<br>(0.51-1.37) | 0.88<br>(0.57-1.35) | 0.76<br>(0.42-1.37) | 0.95<br>(0.58-1.55) | 1.39<br>(0.85-2.26) | 0.88<br>(0.55-1.4)  | 0.56<br>(0.32-1.01) | VD                  | 1.26<br>(0.89-1.79) | 1.37<br>(0.71-2.63) | 1.01<br>(0.72-1.41) |
| 0.59<br>(0.32-1.07) | 0.62<br>(0.45-0.85) | 1.26<br>(0.85-1.87) | 0.56<br>(0.31-1.01) | 1.41<br>(0.95-2.09) | 0.67<br>(0.47-0.94) | 0.7<br>(0.54-0.9)   | 0.6<br>(0.37-0.97)  | 0.75<br>(0.53-1.06) | 1.1<br>(0.79-1.55)  | 0.7<br>(0.51-0.95)  | 0.45<br>(0.28-0.71) | 0.79<br>(0.56-1.13) | VMP                 | 1.09<br>(0.63-1.89) | 0.8<br>(0.63-1.02)  |
| 0.54<br>(0.24-1.22) | 0.57<br>(0.3-1.08)  | 1.16<br>(0.59-2.28) | 0.51<br>(0.23-1.15) | 1.3<br>(0.66-2.56)  | 0.61<br>(0.32-1.17) | 0.64<br>(0.35-1.18) | 0.55<br>(0.26-1.15) | 0.69<br>(0.36-1.33) | 1.02<br>(0.53-1.94) | 0.64<br>(0.34-1.21) | 0.41<br>(0.2-0.85)  | 0.73<br>(0.38-1.41) | 0.92<br>(0.53-1.6)  | VMPT-VT             | 0.74<br>(0.4-1.35)  |
| 0.73<br>(0.38-1.39) | 0.77<br>(0.52-1.15) | 1.57<br>(0.99-2.49) | 0.69<br>(0.37-1.31) | 1.75<br>(1.11-2.79) | 0.83<br>(0.55-1.26) | 0.87<br>(0.61-1.23) | 0.75<br>(0.44-1.28) | 0.94<br>(0.62-1.43) | 1.38<br>(0.91-2.08) | 0.87<br>(0.59-1.28) | 0.56<br>(0.33-0.94) | 0.99<br>(0.71-1.38) | 1.25<br>(0.98-1.58) | 1.35<br>(0.74-2.47) | VTD                 |

**Supplementary table 8** Effect of initial regimens for elderly MM patients on OS. Therapies are reported in alphabetical order. The values in the matrix represent the weighted hazard ratio (HR) and 95% confidence interval for the row-defining treatment vs. the column-defining treatment.

**Abbreviations:** V, bortezomib; M, melphalan; P, prednisone; T, thalidomide; D, dexamethasone; S, siltuximab; R/L, lenalidomide; MEL100,

reduced-intensity stem cell transplantation using melphalan 100 mg/m<sup>2</sup>; Ld continuous, lenalidomide plus dexamethasone in 28-day cycles until disease progression; Ld 18 cycles, lenalidomide plus dexamethasone for 18 cycles; Ld 9 cycles, lenalidomide plus dexamethasone for 9 cycles.

|                     |                     |                     |                     |                     |                      |                     |                     |                     |                     |                     |                     |                     |                     |                     |
|---------------------|---------------------|---------------------|---------------------|---------------------|----------------------|---------------------|---------------------|---------------------|---------------------|---------------------|---------------------|---------------------|---------------------|---------------------|
| CPR                 | 0.4<br>(0.17-0.91)  | 0.48<br>(0.19-1.23) | 0.61<br>(0.44-0.84) | 0.47<br>(0.19-1.2)  | 2.21<br>(1.33-3.68)  | 0.78<br>(0.56-1.11) | 0.77<br>(0.48-1.22) | 0.73<br>(0.29-1.83) | 0.76<br>(0.47-1.22) | 1.12<br>(0.55-2.29) | 0.48<br>(0.24-0.97) | 0.42<br>(0.22-0.8)  | 0.35<br>(0.18-0.69) | 0.35<br>(0.18-0.69) |
| 2.52<br>(1.09-5.8)  | CTD                 | 1.22<br>(0.44-3.38) | 1.54<br>(0.68-3.47) | 1.19<br>(0.43-3.31) | 5.56<br>(2.88-10.75) | 1.98<br>(0.92-4.22) | 1.93<br>(0.94-3.96) | 1.85<br>(0.68-5.05) | 1.91<br>(0.93-3.89) | 2.82<br>(1.23-6.45) | 1.21<br>(0.54-2.73) | 1.06<br>(0.49-2.28) | 0.89<br>(0.41-1.95) | 0.89<br>(0.4-1.96)  |
| 2.07<br>(0.82-5.24) | 0.82<br>(0.3-2.27)  | Ld 18 cycles        | 1.26<br>(0.51-3.14) | 0.98<br>(0.85-1.12) | 4.56<br>(2.1-9.93)   | 1.62<br>(0.68-3.85) | 1.58<br>(0.69-3.63) | 1.52<br>(1.29-1.79) | 1.56<br>(0.69-3.57) | 2.31<br>(0.92-5.83) | 0.99<br>(0.4-2.47)  | 0.87<br>(0.36-2.07) | 0.73<br>(0.3-1.77)  | 0.73<br>(0.3-1.78)  |
| 1.64<br>(1.19-2.26) | 0.65<br>(0.29-1.47) | 0.79<br>(0.32-1.97) | Ld 9 cycles         | 0.78<br>(0.31-1.94) | 3.62<br>(2.24-5.84)  | 1.28<br>(0.96-1.73) | 1.25<br>(0.82-1.92) | 1.2<br>(0.49-2.95)  | 1.24<br>(0.79-1.94) | 1.83<br>(0.92-3.66) | 0.79<br>(0.4-1.54)  | 0.69<br>(0.37-1.28) | 0.58<br>(0.31-1.1)  | 0.58<br>(0.3-1.1)   |
| 2.11<br>(0.83-5.34) | 0.84<br>(0.3-2.32)  | 1.02<br>(0.89-1.17) | 1.29<br>(0.52-3.21) | Ld continuous       | 4.66<br>(2.14-10.13) | 1.65<br>(0.7-3.92)  | 1.61<br>(0.7-3.7)   | 1.55<br>(1.31-1.82) | 1.6<br>(0.7-3.64)   | 2.36<br>(0.94-5.95) | 1.01<br>(0.41-2.52) | 0.89<br>(0.37-2.12) | 0.75<br>(0.31-1.81) | 0.74<br>(0.3-1.81)  |
| 0.45<br>(0.27-0.75) | 0.18<br>(0.09-0.35) | 0.22 (0.1-0.48)     | 0.28<br>(0.17-0.45) | 0.21<br>(0.1-0.47)  | MP                   | 0.36<br>(0.24-0.52) | 0.35<br>(0.26-0.46) | 0.33<br>(0.16-0.71) | 0.34<br>(0.26-0.45) | 0.51<br>(0.31-0.84) | 0.22<br>(0.13-0.35) | 0.19<br>(0.13-0.28) | 0.16<br>(0.11-0.24) | 0.16<br>(0.1-0.25)  |
| 1.27<br>(0.9-1.8)   | 0.51<br>(0.24-1.08) | 0.62<br>(0.26-1.46) | 0.78<br>(0.58-1.05) | 0.6<br>(0.25-1.43)  | 2.81<br>(1.93-4.1)   | MPR                 | 0.98<br>(0.72-1.33) | 0.94<br>(0.4-2.18)  | 0.96<br>(0.69-1.35) | 1.43<br>(0.76-2.67) | 0.61<br>(0.33-1.12) | 0.54<br>(0.31-0.92) | 0.45<br>(0.26-0.79) | 0.45<br>(0.25-0.8)  |
| 1.31<br>(0.82-2.08) | 0.52<br>(0.25-1.06) | 0.63<br>(0.28-1.45) | 0.8<br>(0.52-1.22)  | 0.62<br>(0.27-1.42) | 2.88<br>(2.16-3.85)  | 1.02<br>(0.75-1.4)  | MPR-R               | 0.96<br>(0.43-2.16) | 0.99<br>(0.85-1.15) | 1.46<br>(0.82-2.6)  | 0.63<br>(0.36-1.09) | 0.55<br>(0.34-0.89) | 0.46<br>(0.28-0.77) | 0.46<br>(0.27-0.78) |
| 1.36<br>(0.55-3.4)  | 0.54<br>(0.2-1.48)  | 0.66<br>(0.56-0.78) | 0.83<br>(0.34-2.04) | 0.65<br>(0.55-0.76) | 3.01<br>(1.41-6.43)  | 1.07<br>(0.46-2.5)  | 1.04<br>(0.46-2.35) | MPT                 | 1.03<br>(0.46-2.31) | 1.53<br>(0.61-3.79) | 0.65<br>(0.27-1.6)  | 0.57<br>(0.24-1.35) | 0.48<br>(0.2-1.15)  | 0.48<br>(0.2-1.15)  |
| 1.32<br>(0.82-2.13) | 0.52<br>(0.26-1.07) | 0.64<br>(0.28-1.46) | 0.81<br>(0.52-1.26) | 0.63<br>(0.27-1.43) | 2.92<br>(2.22-3.84)  | 1.04<br>(0.74-1.45) | 1.01<br>(0.87-1.17) | 0.97<br>(0.43-2.17) | MPT-T               | 1.48<br>(0.84-2.62) | 0.63<br>(0.37-1.1)  | 0.56<br>(0.34-0.9)  | 0.47<br>(0.28-0.77) | 0.46<br>(0.28-0.78) |
| 0.89<br>(0.44-1.83) | 0.35<br>(0.16-0.81) | 0.43<br>(0.17-1.09) | 0.55<br>(0.27-1.09) | 0.42<br>(0.17-1.07) | 1.97<br>(1.2-3.25)   | 0.7<br>(0.37-1.31)  | 0.68<br>(0.38-1.22) | 0.66<br>(0.26-1.63) | 0.68<br>(0.38-1.2)  | TD                  | 0.43<br>(0.21-0.86) | 0.38<br>(0.2-0.71)  | 0.32<br>(0.16-0.61) | 0.31<br>(0.16-0.61) |
| 2.08<br>(1.04-4.19) | 0.83<br>(0.37-1.87) | 1.01<br>(0.41-2.51) | 1.27<br>(0.65-2.5)  | 0.99<br>(0.4-2.46)  | 4.6<br>(2.86-7.42)   | 1.64<br>(0.89-3)    | 1.6<br>(0.91-2.79)  | 1.53<br>(0.62-3.75) | 1.58<br>(0.91-2.74) | 2.33<br>(1.17-4.66) | VD                  | 0.88<br>(0.67-1.15) | 0.74<br>(0.54-1.01) | 0.73<br>(0.56-0.95) |
| 2.38<br>(1.25-4.52) | 0.94<br>(0.44-2.03) | 1.15<br>(0.48-2.75) | 1.45<br>(0.78-2.69) | 1.13<br>(0.47-2.69) | 5.25<br>(3.55-7.76)  | 1.87<br>(1.08-3.21) | 1.82<br>(1.12-2.96) | 1.74<br>(0.74-4.1)  | 1.8<br>(1.12-2.9)   | 2.66<br>(1.41-5.02) | 1.14<br>(0.87-1.5)  | VMP                 | 0.84<br>(0.72-0.99) | 0.84<br>(0.68-1.03) |
| 2.83<br>(1.46-5.48) | 1.12<br>(0.51-2.46) | 1.37<br>(0.56-3.31) | 1.73<br>(0.91-3.27) | 1.34<br>(0.55-3.25) | 6.24<br>(4.09-9.52)  | 2.22<br>(1.26-3.9)  | 2.16<br>(1.3-3.61)  | 2.07<br>(0.87-4.95) | 2.14<br>(1.29-3.54) | 3.16<br>(1.64-6.09) | 1.36<br>(0.99-1.86) | 1.19<br>(1.01-1.4)  | VMP-T               | 0.99<br>(0.77-1.29) |
| 2.84<br>(1.45-5.58) | 1.13<br>(0.51-2.5)  | 1.38<br>(0.56-3.36) | 1.74<br>(0.91-3.33) | 1.35<br>(0.55-3.3)  | 6.28<br>(4.04-9.76)  | 2.23<br>(1.25-3.98) | 2.18<br>(1.29-3.69) | 2.09<br>(0.87-5.02) | 2.15<br>(1.28-3.62) | 3.18<br>(1.63-6.2)  | 1.36<br>(1.05-1.77) | 1.2<br>(0.97-1.47)  | 1.01<br>(0.77-1.31) | VTD                 |

**Supplementary table 9** Sensitive analysis of effect of initial regimens for elderly MM patients on CR/nCR rates. Therapies are reported in alphabetical order. The values in the matrix represent the weighted relative risk (RR) and 95% confidence interval for the row-defining treatment vs. the column-defining treatment.

**Abbreviations:** V, bortezomib; M, melphalan; P, prednisone; T, thalidomide; D, dexamethasone; S, siltuximab; R/L, lenalidomide; MEL100, reduced-intensity stem cell transplantation using melphalan 100 mg/m<sup>2</sup>; Ld continuous, lenalidomide plus dexamethasone in 28-day cycles until disease progression; Ld 18 cycles, lenalidomide plus dexamethasone for 18 cycles; Ld 9 cycles, lenalidomide plus dexamethasone for 9 cycles.

|     |                     |                    |                     |                     |                     |                     |                     |                     |                     |                     |                    |                     |                    |                     |
|-----|---------------------|--------------------|---------------------|---------------------|---------------------|---------------------|---------------------|---------------------|---------------------|---------------------|--------------------|---------------------|--------------------|---------------------|
| CPR | 0.65<br>(0.51-0.84) | 0.55<br>(0.37-0.8) | 0.92<br>(0.82-1.04) | 0.53<br>(0.37-0.78) | 1.27<br>(1.04-1.55) | 0.96<br>(0.85-1.09) | 0.85<br>(0.71-1.03) | 0.64<br>(0.44-0.93) | 0.87<br>(0.72-1.05) | 0.94<br>(0.71-1.24) | 0.66<br>(0.5-0.87) | 0.66<br>(0.51-0.85) | 0.6<br>(0.46-0.78) | 0.62<br>(0.47-0.81) |
|-----|---------------------|--------------------|---------------------|---------------------|---------------------|---------------------|---------------------|---------------------|---------------------|---------------------|--------------------|---------------------|--------------------|---------------------|

|                     |                     |                     |                     |                     |                     |                     |                     |                     |                     |                     |                     |                     |                     |                     |
|---------------------|---------------------|---------------------|---------------------|---------------------|---------------------|---------------------|---------------------|---------------------|---------------------|---------------------|---------------------|---------------------|---------------------|---------------------|
| 1.53<br>(1.19-1.97) | CTD                 | 0.84<br>(0.58-1.2)  | 1.41<br>(1.1-1.8)   | 0.82<br>(0.57-1.17) | 1.94<br>(1.67-2.27) | 1.47<br>(1.18-1.83) | 1.31<br>(1.08-1.57) | 0.98<br>(0.69-1.39) | 1.32<br>(1.1-1.59)  | 1.43<br>(1.12-1.84) | 1.01<br>(0.78-1.3)  | 1.01<br>(0.81-1.25) | 0.92<br>(0.73-1.16) | 0.95<br>(0.75-1.19) |
| 1.83<br>(1.25-2.67) | 1.2<br>(0.84-1.71)  | Ld 18<br>cycles     | 1.68<br>(1.15-2.46) | 0.98<br>(0.91-1.05) | 2.32<br>(1.68-3.21) | 1.75<br>(1.22-2.51) | 1.56<br>(1.11-2.19) | 1.18<br>(1.08-1.28) | 1.58<br>(1.13-2.22) | 1.71<br>(1.17-2.5)  | 1.21<br>(0.82-1.76) | 1.21<br>(0.84-1.72) | 1.1 (0.77-<br>1.58) | 1.13<br>(0.78-1.63) |
| 1.09<br>(0.96-1.23) | 0.71<br>(0.55-0.91) | 0.59<br>(0.41-0.87) | Ld 9 cycles         | 0.58<br>(0.4-0.85)  | 1.38<br>(1.14-1.68) | 1.04<br>(0.93-1.17) | 0.93<br>(0.78-1.11) | 0.7<br>(0.48-1.01)  | 0.94<br>(0.78-1.13) | 1.02<br>(0.77-1.34) | 0.72<br>(0.54-0.95) | 0.72<br>(0.56-0.92) | 0.65<br>(0.51-0.85) | 0.67<br>(0.52-0.87) |
| 1.87<br>(1.28-2.74) | 1.22<br>(0.86-1.75) | 1.02<br>(0.95-1.1)  | 1.72<br>(1.18-2.51) | Ld<br>continuous    | 2.38<br>(1.72-3.29) | 1.8<br>(1.25-2.57)  | 1.6<br>(1.14-2.25)  | 1.21<br>(1.11-1.31) | 1.62<br>(1.16-2.27) | 1.75<br>(1.2-2.56)  | 1.23<br>(0.84-1.8)  | 1.24<br>(0.87-1.76) | 1.13<br>(0.78-1.62) | 1.16<br>(0.8-1.67)  |
| 0.79<br>(0.64-0.96) | 0.51<br>(0.44-0.6)  | 0.43<br>(0.31-0.59) | 0.72<br>(0.6-0.88)  | 0.42<br>(0.3-0.58)  | MP                  | 0.75<br>(0.65-0.88) | 0.67<br>(0.6-0.75)  | 0.51<br>(0.37-0.69) | 0.68<br>(0.62-0.75) | 0.74<br>(0.61-0.9)  | 0.52<br>(0.43-0.63) | 0.52<br>(0.45-0.6)  | 0.47<br>(0.4-0.56)  | 0.49<br>(0.41-0.58) |
| 1.04<br>(0.92-1.18) | 0.68<br>(0.55-0.85) | 0.57<br>(0.4-0.82)  | 0.96<br>(0.85-1.08) | 0.56<br>(0.39-0.8)  | 1.33<br>(1.13-1.55) | MPR                 | 0.89<br>(0.78-1.02) | 0.67<br>(0.47-0.95) | 0.9<br>(0.78-1.04)  | 0.98<br>(0.76-1.26) | 0.69<br>(0.53-0.89) | 0.69<br>(0.55-0.85) | 0.63<br>(0.5-0.79)  | 0.65<br>(0.51-0.82) |
| 1.17<br>(0.97-1.41) | 0.77<br>(0.64-0.92) | 0.64<br>(0.46-0.9)  | 1.08<br>(0.9-1.29)  | 0.63<br>(0.45-0.88) | 1.49<br>(1.34-1.66) | 1.12<br>(0.98-1.29) | MPR-R               | 0.75<br>(0.54-1.05) | 1.01<br>(0.95-1.08) | 1.1<br>(0.88-1.37)  | 0.77<br>(0.62-0.97) | 0.77<br>(0.64-0.93) | 0.71<br>(0.58-0.86) | 0.73(0.59-<br>0.89) |
| 1.55<br>(1.07-2.25) | 1.02<br>(0.72-1.44) | 0.85<br>(0.78-0.92) | 1.43<br>(0.99-2.07) | 0.83<br>(0.76-0.9)  | 1.97<br>(1.44-2.7)  | 1.49<br>(1.05-2.11) | 1.33<br>(0.95-1.85) | MPT                 | 1.34<br>(0.97-1.87) | 1.46<br>(1.01-2.11) | 1.02<br>(0.71-1.48) | 1.02<br>(0.72-1.45) | 0.94<br>(0.66-1.33) | 0.96<br>(0.67-1.38) |
| 1.16<br>(0.95-1.4)  | 0.76<br>(0.63-0.91) | 0.63<br>(0.45-0.89) | 1.06<br>(0.88-1.28) | 0.62<br>(0.44-0.87) | 1.47<br>(1.33-1.62) | 1.11<br>(0.96-1.28) | 0.99<br>(0.93-1.05) | 0.74<br>(0.54-1.03) | MPT-T               | 1.08<br>(0.87-1.35) | 0.76<br>(0.61-0.95) | 0.76<br>(0.64-0.91) | 0.7<br>(0.57-0.84)  | 0.72<br>(0.58-0.87) |
| 1.07<br>(0.81-1.41) | 0.7<br>(0.54-0.9)   | 0.58<br>(0.4-0.85)  | 0.98<br>(0.74-1.3)  | 0.57<br>(0.39-0.83) | 1.36<br>(1.11-1.65) | 1.02<br>(0.8-1.32)  | 0.91<br>(0.73-1.14) | 0.69<br>(0.47-0.99) | 0.92<br>(0.74-1.15) | TD                  | 0.7<br>(0.53-0.93)  | 0.7<br>(0.55-0.9)   | 0.64<br>(0.5-0.83)  | 0.66<br>(0.51-0.86) |
| 1.52<br>(1.14-2.01) | 0.99<br>(0.77-1.28) | 0.83<br>(0.57-1.21) | 1.4<br>(1.06-1.85)  | 0.81<br>(0.55-1.18) | 1.93<br>(1.58-2.35) | 1.45<br>(1.13-1.87) | 1.29<br>(1.03-1.62) | 0.98<br>(0.67-1.41) | 1.31<br>(1.05-1.64) | 1.42<br>(1.07-1.88) | VD                  | 1<br>(0.88-1.14)    | 0.91<br>(0.79-1.06) | 0.94<br>(0.83-1.06) |
| 1.52<br>(1.18-1.95) | 0.99<br>(0.8-1.23)  | 0.83<br>(0.58-1.18) | 1.4<br>(1.09-1.78)  | 0.81<br>(0.57-1.16) | 1.93<br>(1.66-2.24) | 1.45<br>(1.17-1.8)  | 1.29<br>(1.08-1.55) | 0.98<br>(0.69-1.38) | 1.31<br>(1.1-1.57)  | 1.42<br>(1.11-1.82) | 1<br>(0.88-1.14)    | VMP                 | 0.91<br>(0.85-0.98) | 0.94<br>(0.86-1.03) |
| 1.66<br>(1.28-2.15) | 1.09<br>(0.87-1.36) | 0.91<br>(0.63-1.31) | 1.53<br>(1.18-1.98) | 0.89<br>(0.62-1.28) | 2.11<br>(1.79-2.49) | 1.59<br>(1.27-2)    | 1.42<br>(1.16-1.73) | 1.07<br>(0.75-1.52) | 1.44<br>(1.18-1.75) | 1.56<br>(1.2-2.01)  | 1.1<br>(0.94-1.27)  | 1.1<br>(1.02-1.18)  | VMPT-VT             | 1.03<br>(0.91-1.16) |
| 1.62<br>(1.24-2.11) | 1.06<br>(0.84-1.33) | 0.88<br>(0.61-1.28) | 1.49<br>(1.14-1.93) | 0.86<br>(0.6-1.25)  | 2.05<br>(1.72-2.44) | 1.55<br>(1.23-1.96) | 1.38<br>(1.12-1.69) | 1.04<br>(0.73-1.49) | 1.4<br>(1.14-1.71)  | 1.51<br>(1.16-1.97) | 1.07<br>(0.94-1.21) | 1.07<br>(0.97-1.17) | 0.97<br>(0.87-1.09) | VTD                 |

**Supplementary table 10** Sensitive analysis of effect of initial regimens for elderly MM patients on ORR rates. Therapies are reported in alphabetical order. The values in the matrix represent the weighted relative risk (RR) and 95% confidence interval for the row-defining treatment vs. the column-defining treatment.

**Abbreviations:** V, bortezomib; M, melphalan; P, prednisone; T, thalidomide; D, dexamethasone; S, siltuximab; R/L, lenalidomide; MEL100, reduced-intensity stem cell transplantation using melphalan 100 mg/m<sup>2</sup>; Ld continuous, lenalidomide plus dexamethasone in 28-day cycles until disease progression; Ld 18 cycles, lenalidomide plus dexamethasone for 18 cycles; Ld 9 cycles, lenalidomide plus dexamethasone for 9 cycles.

|                  |                  |                  |                  |                  |                  |                  |                  |                  |                  |                  |
|------------------|------------------|------------------|------------------|------------------|------------------|------------------|------------------|------------------|------------------|------------------|
| CPR              | 0.94 (0.39-2.28) | 1.8 (0.63-5.17)  | 1.01 (0.6-1.68)  | 2.57 (0.89-7.4)  | 1.15 (0.56-2.35) | 1.25 (0.72-2.18) | 2.03 (0.98-4.17) | 1.85 (0.74-4.64) | 1.66 (0.79-3.48) | 0.88 (0.35-2.23) |
| 1.06 (0.44-2.57) | CTD              | 1.91 (0.75-4.87) | 1.07 (0.44-2.59) | 2.73 (1.07-6.97) | 1.22 (0.72-2.06) | 1.33 (0.67-2.65) | 2.15 (1.14-4.07) | 1.97 (0.9-4.28)  | 1.76 (0.97-3.21) | 0.94 (0.43-2.06) |
| 0.56 (0.19-1.59) | 0.52 (0.21-1.33) | Ld 18 cycles     | 0.56 (0.19-1.61) | 1.43 (0.85-2.41) | 0.64 (0.29-1.39) | 0.7 (0.28-1.71)  | 1.13 (0.48-2.65) | 1.03 (0.61-1.73) | 0.92 (0.4-2.11)  | 0.49 (0.19-1.3)  |
| 0.99 (0.6-1.66)  | 0.94 (0.39-2.27) | 1.79 (0.62-5.14) | Ld 9 cycles      | 2.56 (0.89-7.36) | 1.14 (0.56-2.34) | 1.24 (0.71-2.17) | 2.01 (0.98-4.14) | 1.84 (0.74-4.61) | 1.65 (0.79-3.46) | 0.88 (0.35-2.22) |
| 0.39 (0.14-1.12) | 0.37 (0.14-0.94) | 0.7 (0.42-1.18)  | 0.39 (0.14-1.13) | Ld continuous    | 0.45 (0.21-0.97) | 0.49 (0.2-1.2)   | 0.79 (0.33-1.86) | 0.72 (0.43-1.22) | 0.65 (0.28-1.48) | 0.34 (0.13-0.91) |
| 0.87 (0.43-1.78) | 0.82 (0.49-1.38) | 1.57 (0.72-3.4)  | 0.88 (0.43-1.79) | 2.24 (1.03-4.88) | MP               | 1.09 (0.69-1.71) | 1.76 (1.22-2.54) | 1.61 (0.91-2.86) | 1.45 (1.08-1.93) | 0.77 (0.43-1.39) |

|                  |                  |                  |                  |                  |                  |                  |                  |                  |                  |                  |
|------------------|------------------|------------------|------------------|------------------|------------------|------------------|------------------|------------------|------------------|------------------|
| 0.8 (0.46-1.39)  | 0.75 (0.38-1.5)  | 1.44 (0.59-3.52) | 0.8 (0.46-1.4)   | 2.05 (0.84-5.05) | 0.92 (0.58-1.44) | MPR              | 1.62 (1.02-2.57) | 1.48 (0.71-3.07) | 1.33 (0.82-2.16) | 0.71 (0.34-1.48) |
| 0.49 (0.24-1.02) | 0.47 (0.25-0.88) | 0.89 (0.38-2.09) | 0.5 (0.24-1.02)  | 1.27 (0.54-3)    | 0.57 (0.39-0.82) | 0.62 (0.39-0.98) | MPR-R            | 0.92 (0.46-1.81) | 0.82 (0.59-1.14) | 0.44 (0.22-0.87) |
| 0.54 (0.22-1.35) | 0.51 (0.23-1.11) | 0.97 (0.58-1.63) | 0.54 (0.22-1.36) | 1.39 (0.82-2.35) | 0.62 (0.35-1.1)  | 0.68 (0.33-1.4)  | 1.09 (0.55-2.16) | MPT              | 0.9 (0.47-1.71)  | 0.48 (0.21-1.09) |
| 0.6 (0.29-1.26)  | 0.57 (0.31-1.03) | 1.08 (0.47-2.48) | 0.61 (0.29-1.27) | 1.55 (0.67-3.55) | 0.69 (0.52-0.92) | 0.75 (0.46-1.23) | 1.22 (0.88-1.69) | 1.12 (0.59-2.12) | MPT-T            | 0.53 (0.28-1.03) |
| 1.13 (0.45-2.86) | 1.07 (0.48-2.34) | 2.04 (0.77-5.39) | 1.14 (0.45-2.88) | 2.91 (1.1-7.73)  | 1.3 (0.72-2.34)  | 1.42 (0.67-2.98) | 2.29 (1.15-4.58) | 2.1 (0.92-4.77)  | 1.88 (0.98-3.62) | TD               |

**Supplementary table 11** Sensitive analysis of effect of initial regimens for elderly MM patients on PFS rates. Therapies are reported in alphabetical order. The values in the matrix represent the weighted relative risk (RR) and 95% confidence interval for the row-defining treatment vs. the column-defining treatment.

**Abbreviations:** V, bortezomib; M, melphalan; P, prednisone; T, thalidomide; D, dexamethasone; S, siltuximab; R/L, lenalidomide; MEL100, reduced-intensity stem cell transplantation using melphalan 100 mg/m<sup>2</sup>; Ld continuous, lenalidomide plus dexamethasone in 28-day cycles until disease progression; Ld 18 cycles, lenalidomide plus dexamethasone for 18 cycles; Ld 9 cycles, lenalidomide plus dexamethasone for 9 cycles.

|                  |                  |                  |                  |                  |                  |                  |                  |                  |                  |                  |                  |                  |                  |                  |
|------------------|------------------|------------------|------------------|------------------|------------------|------------------|------------------|------------------|------------------|------------------|------------------|------------------|------------------|------------------|
| CPR              | 1.07 (0.6-1.89)  | 2.01 (1.03-3.93) | 0.95 (0.8-1.13)  | 2.25 (1.15-4.39) | 1.2 (0.7-2.05)   | 1.02 (0.72-1.45) | 1.28 (0.76-2.15) | 1.76 (0.93-3.34) | 1.18 (0.69-2.01) | 0.77 (0.4-1.49)  | 1.37 (0.68-2.74) | 1.72 (0.95-3.13) | 1.87 (0.83-4.23) | 1.38 (0.73-2.64) |
| 0.94 (0.53-1.66) | CTD              | 1.89 (1.22-2.93) | 0.89 (0.5-1.57)  | 2.11 (1.35-3.28) | 1.12 (0.93-1.36) | 0.96 (0.61-1.51) | 1.2 (0.89-1.61)  | 1.65 (1.12-2.45) | 1.1 (0.86-1.43)  | 0.72 (0.47-1.11) | 1.28 (0.8-2.06)  | 1.62 (1.17-2.23) | 1.76 (0.93-3.33) | 1.3 (0.87-1.94)  |
| 0.5 (0.25-0.97)  | 0.53 (0.34-0.82) | Ld 18 cycles     | 0.47 (0.24-0.92) | 1.12 (0.91-1.37) | 0.6 (0.4-0.89)   | 0.51 (0.29-0.9)  | 0.64 (0.4-1)     | 0.88 (0.72-1.07) | 0.59 (0.38-0.9)  | 0.38 (0.22-0.67) | 0.68 (0.38-1.23) | 0.86 (0.53-1.38) | 0.93 (0.45-1.93) | 0.69 (0.4-1.17)  |
| 1.05 (0.88-1.26) | 1.12 (0.64-1.98) | 2.12 (1.09-4.12) | Ld 9 cycles      | 2.37 (1.22-4.61) | 1.26 (0.74-2.15) | 1.08 (0.77-1.52) | 1.35 (0.8-2.26)  | 1.86 (0.98-3.51) | 1.24 (0.73-2.11) | 0.81 (0.42-1.57) | 1.44 (0.72-2.88) | 1.82 (1-3.29)    | 1.98 (0.88-4.44) | 1.46 (0.77-2.77) |
| 0.45 (0.23-0.87) | 0.47 (0.31-0.74) | 0.9 (0.73-1.1)   | 0.42 (0.22-0.82) | Ld continuous    | 0.53 (0.36-0.79) | 0.46 (0.26-0.81) | 0.57 (0.36-0.9)  | 0.78 (0.64-0.96) | 0.52 (0.34-0.81) | 0.34 (0.2-0.6)   | 0.61 (0.34-1.1)  | 0.77 (0.48-1.23) | 0.83 (0.4-1.73)  | 0.62 (0.36-1.05) |
| 0.83 (0.49-1.43) | 0.89 (0.74-1.08) | 1.68 (1.13-2.5)  | 0.79 (0.46-1.35) | 1.88 (1.26-2.8)  | MP               | 0.85 (0.57-1.29) | 1.07 (0.85-1.34) | 1.47 (1.04-2.07) | 0.98 (0.83-1.17) | 0.65 (0.44-0.94) | 1.14 (0.74-1.77) | 1.44 (1.11-1.86) | 1.56 (0.85-2.88) | 1.16 (0.81-1.65) |
| 0.98 (0.69-1.39) | 1.04 (0.66-1.64) | 1.97 (1.11-3.48) | 0.93 (0.66-1.31) | 2.2 (1.24-3.89)  | 1.17 (0.78-1.76) | MPR              | 1.25 (0.85-1.84) | 1.72 (1.01-2.94) | 1.15 (0.77-1.73) | 0.76 (0.43-1.32) | 1.34 (0.74-2.43) | 1.69 (1.04-2.74) | 1.83 (0.88-3.82) | 1.35 (0.79-2.32) |
| 0.78 (0.46-1.32) | 0.83 (0.62-1.12) | 1.57 (1-2.49)    | 0.74 (0.44-1.24) | 1.76 (1.11-2.79) | 0.94 (0.75-1.18) | 0.8 (0.54-1.18)  | MPR-R            | 1.38 (0.91-2.08) | 0.92 (0.77-1.11) | 0.6 (0.39-0.94)  | 1.07 (0.65-1.75) | 1.35 (0.95-1.91) | 1.47 (0.76-2.81) | 1.08 (0.71-1.65) |
| 0.57 (0.3-1.08)  | 0.61 (0.41-0.9)  | 1.14 (0.94-1.39) | 0.54 (0.29-1.02) | 1.28 (1.04-1.56) | 0.68 (0.48-0.96) | 0.58 (0.34-0.99) | 0.73 (0.48-1.1)  | MPT              | 0.67 (0.46-0.98) | 0.44 (0.26-0.73) | 0.78 (0.45-1.35) | 0.98 (0.64-1.51) | 1.06 (0.53-2.14) | 0.79 (0.48-1.29) |
| 0.85 (0.5-1.45)  | 0.91 (0.7-1.17)  | 1.71 (1.11-2.63) | 0.81 (0.47-1.37) | 1.91 (1.24-2.95) | 1.02 (0.86-1.21) | 0.87 (0.58-1.3)  | 1.09 (0.9-1.31)  | 1.5 (1.02-2.2)   | MP-T             | 0.66 (0.43-1)    | 1.16 (0.73-1.86) | 1.46 (1.07-2)    | 1.59 (0.84-3)    | 1.18 (0.79-1.74) |
| 1.29 (0.67-2.5)  | 1.38 (0.9-2.11)  | 2.6 (1.5-4.51)   | 1.23 (0.64-2.36) | 2.91 (1.67-5.05) | 1.55 (1.06-2.27) | 1.32 (0.76-2.31) | 1.65 (1.06-2.58) | 2.28 (1.36-3.81) | 1.52 (1-2.31)    | TD               | 1.77 (0.99-3.16) | 2.23 (1.41-3.53) | 2.42 (1.18-4.98) | 1.79 (1.06-3.01) |
| 0.73 (0.37-1.46) | 0.78 (0.48-1.25) | 1.47 (0.81-2.65) | 0.69 (0.35-1.38) | 1.64 (0.91-2.96) | 0.88 (0.57-1.35) | 0.75 (0.41-1.36) | 0.93 (0.57-1.53) | 1.29 (0.74-2.24) | 0.86 (0.54-1.37) | 0.56 (0.32-1.01) | VD               | 1.26 (0.89-1.79) | 1.37 (0.71-2.63) | 1.01 (0.72-1.41) |
| 0.58 (0.32-1.05) | 0.62 (0.45-0.85) | 1.17 (0.73-1.87) | 0.55(0.3-1)      | 1.3 (0.81-2.1)   | 0.7 (0.54-0.9)   | 0.59 (0.37-0.96) | 0.74 (0.52-1.05) | 1.02 (0.66-1.57) | 0.68 (0.5-0.93)  | 0.45 (0.28-0.71) | 0.79 (0.56-1.13) | VMP              | 1.09 (0.63-1.89) | 0.8 (0.63-1.02)  |

|                     |                     |                     |                     |                     |                     |                     |                     |                     |                     |                     |                     |                     |                     |                    |
|---------------------|---------------------|---------------------|---------------------|---------------------|---------------------|---------------------|---------------------|---------------------|---------------------|---------------------|---------------------|---------------------|---------------------|--------------------|
| 0.53<br>(0.24-1.2)  | 0.57<br>(0.3-1.08)  | 1.07<br>(0.52-2.22) | 0.51<br>(0.23-1.14) | 1.2<br>(0.58-2.49)  | 0.64<br>(0.35-1.18) | 0.55<br>(0.26-1.14) | 0.68<br>(0.36-1.31) | 0.94<br>(0.47-1.89) | 0.63<br>(0.33-1.18) | 0.41<br>(0.2-0.85)  | 0.73<br>(0.38-1.41) | 0.92<br>(0.53-1.6)  | VMPT-VT             | 0.74<br>(0.4-1.35) |
| 0.72<br>(0.38-1.38) | 0.77<br>(0.52-1.15) | 1.45<br>(0.85-2.47) | 0.69<br>(0.36-1.3)  | 1.62<br>(0.95-2.77) | 0.87<br>(0.61-1.23) | 0.74<br>(0.43-1.27) | 0.92<br>(0.61-1.41) | 1.27<br>(0.78-2.09) | 0.85<br>(0.57-1.26) | 0.56<br>(0.33-0.94) | 0.99<br>(0.71-1.38) | 1.25<br>(0.98-1.58) | 1.35<br>(0.74-2.47) | VTD                |

**Supplementary table 12** Sensitive analysis of effect of initial regimens for elderly MM patients on OS. Therapies are reported in alphabetical order. The values in the matrix represent the weighted relative risk (RR) and 95% confidence interval for the row-defining treatment vs. the column-defining treatment.

**Abbreviations:** V, bortezomib; M, melphalan; P, prednisone; T, thalidomide; D, dexamethasone; S, siltuximab; R/L, lenalidomide; MEL100, reduced-intensity stem cell transplantation using melphalan 100 mg/m<sup>2</sup>; Ld continuous, lenalidomide plus dexamethasone in 28-day cycles until disease progression; Ld 18 cycles, lenalidomide plus dexamethasone for 18 cycles; Ld 9 cycles, lenalidomide plus dexamethasone for 9 cycles.

**Figure S1** Inconsistency plot for the key endpoints assuming loop-specific heterogeneity estimates using the method of moments estimator. (A) inconsistency plot for CR/nCR, (B) inconsistency plot for ORR, (C) inconsistency plot for PFS, (D) inconsistency plot for OS.

**Abbreviations:** V, bortezomib; M, melphalan; P, prednisone; T, thalidomide; D, dexamethasone; R/L, lenalidomide; MEL100, reduced-intensity stem cell transplantation using melphalan 100 mg/m<sup>2</sup>;

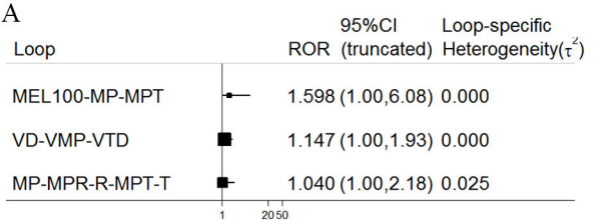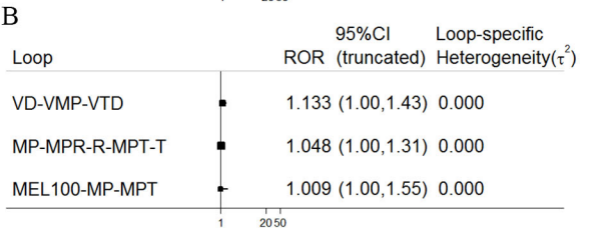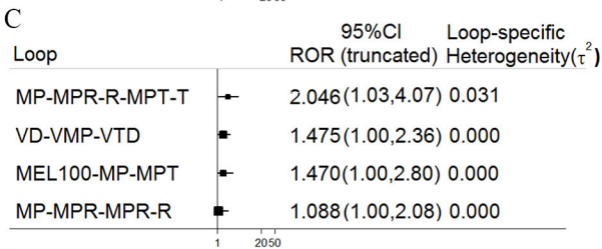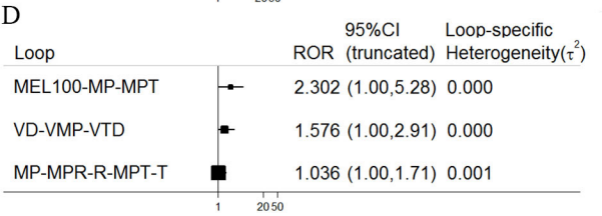

Supplement: Supplementary file 1 [file get_supplementary_file.php]
